## 1 Title

2 Insights into the origin of metazoan multicellularity from predatory unicellular relatives of  
3 animals

## 4 Authors

5 Denis V. Tikhonenkov<sup>1,2\*</sup>, Elisabeth Hehenberger<sup>3</sup>, Anton S. Esaulov<sup>4</sup>, Olga I. Belyakova<sup>4</sup>, Yuri  
6 A. Mazei<sup>5</sup>, Alexander P. Mylnikov<sup>1,†</sup>, Patrick J. Keeling<sup>2</sup>

## 7 Affiliations

8 <sup>1</sup>Papanin Institute for Biology of Inland Waters, Russian Academy of Sciences, Borok, 152742,  
9 Russia

10 <sup>2</sup>Department of Botany, University of British Columbia, Vancouver, V6T 1Z4, British  
11 Columbia, Canada.

12 <sup>3</sup>GEOMAR - Helmholtz Centre for Ocean Research Kiel, Division of Experimental Ecology,  
13 Duesternbrookerweg 20, 24105 Kiel, Germany

14 <sup>4</sup>Penza State University, Penza, 440026, Russia

15 <sup>5</sup>Moscow State University, Moscow, 119991, Russia

16 †Deceased 30 May 2019

17 \*Correspondence to: [tikho-denis@yandex.ru](mailto:tikho-denis@yandex.ru), [pkeeling@mail.ubc.ca](mailto:pkeeling@mail.ubc.ca)

18

## 19 Abstract

20 The diversity and biology of unicellular relatives of animals has strongly informed our  
21 understanding of the transition from single-celled organisms to the multicellular Metazoa. Here  
22 we analyse the cellular structures and complex life cycles of the novel unicellular holozoans  
23 *Pigoraptor* and *Syssomonas* (Opisthokonta). Both lineages are characterized by complex life  
24 cycles with a variety of cell types, the formation of multicellular aggregations and syncytium-  
25 like structures, and an unusual diet for single-celled opisthokonts (partial cell fusion and joint  
26 sucking of a large eukaryotic prey), all of which provide new insights into the origin of  
27 multicellularity in Metazoa. The ability to feed on large eukaryotic prey could have been a  
28 powerful trigger in the formation and development both aggregative (e.g., joint feeding, which  
29 also implies signalling) and clonal (e.g., hypertrophic growth followed by palintomy)  
30 multicellular stages that played important roles in the emergence of multicellular animals.

31

## 32 Introduction

33 The origin of animals (Metazoa) from their unicellular ancestors is one of the most  
34 important evolutionary transitions in the history of life. Questions about the mechanisms of this

35 transformation arose about 200 years ago, but is still far from being resolved today. Most  
36 investigations on the origin of Metazoa have focused on determining the nature of the shared,  
37 multicellular ancestor of all contemporary animals (Moroz et al., 2014; Srivastava et al., 2008;  
38 2010). However, even the branching order of early, non-bilaterian lineages of animals on  
39 phylogenetic trees is still debated: some consider either sponges (Porifera) (Feuda et al., 2017;  
40 Philippe et al., 2009; Simion et al., 2017;) or Ctenophora (Dunn et al., 2008; Ryan et al., 2013;  
41 Whelan et al., 2015) or Placozoa (Schierwater et al., 2009; Signorovitch et al., 2007;) to be the  
42 first branch of extant metazoans. While molecular clock-based studies and paleontological  
43 evidence indicate that multicellular animals arose more than 600 million years ago (Maloof et  
44 al., 2010; Sharpe et al., 2015), we know less about how animals arose. To establish the sequence  
45 of events in the origin of animals from unicellular ancestors, we also need to investigate their  
46 closest relatives, the unicellular opisthokont protists. Information on the diversity and biology of  
47 the unicellular relatives of animals, their placement within the phylogenetic tree of opisthokonts,  
48 and the identification of molecular and morphological traits thought to be specific for animals  
49 within their unicellular sisters, have all strongly informed our understanding of the transition  
50 from single-celled organisms to the multicellular Metazoa (King et al., 2008; Suga et al., 2013;  
51 Suga, Ruiz-Trillo, 2013; Torruella et al., 2015).

52       Until recently, only three unicellular lineages, the choanoflagellates, filastereans,  
53 ichthyosporeans, as well as *Corallochytrium limacisporum*, a mysterious marine osmotrophic  
54 protist described in association with corals, have been described as collectively being sisters to  
55 animals. Together with animals they form the Holozoa within the Opisthokonta (Aleshin et al.,  
56 2007; Lang et al., 2002; Torruella et al., 2015). These unicellular organisms have extremely  
57 variable morphology and biology. Choanoflagellates represent a species-rich group of filter-  
58 feeding, bacterivorous, colony-forming protists, which possess a single flagellum surrounded by  
59 a collar of tentacles (microvilli). They are subdivided into two main groups – the predominantly  
60 marine Acanthoecida and the freshwater and marine Craspedida (Carr et al., 2017). Filastereans  
61 are amoeboid protists producing pseudopodia. Until recently, they were represented by only two  
62 species: the endosymbiont of a freshwater snail, *Capsaspora owczarzaki*, and the free-living  
63 marine heterotroph, *Ministeria vibrans* (Hertel et al., 2002; Shalchian-Tabrizi et al., 2008),  
64 which was recently shown to also possess a single, real flagellum (Mylnikov et al., 2019).  
65 Ichthyosporeans are parasites or endocommensals of vertebrates and invertebrates characterized  
66 by a complex life cycle, reproduction through multinucleated coenocytes colonies and flagellated  
67 and amoeboid dispersal stages (Suga, Ruiz-Trillo, 2013). *Corallochytrium* is a unicellular  
68 coccoid organism, which produces rough, raised colonies and amoeboid limax-like spores

69 (Raghukumar, 1987.). Additionally, molecular data predict a cryptic flagellated stage for  
70 *Corallochytrium* (Torruella et al., 2015).

71 A large number of hypotheses about the origin of multicellular animals have been  
72 proposed. The most developed model for the origin of metazoan multicellularity is based on a  
73 common ancestor with choanoflagellates (James-Clark, 1866; Ivanov, 1967; King et al., 2008,  
74 Mikhailov et al., 2009; Nielsen, 1987, Ratcliff et al., 2012). This idea was initially based on the  
75 observed similarity between choanoflagellates and specialized choanocyte cells in sponges.  
76 Molecular investigations also supported the idea by consistently indicating that choanoflagellates  
77 are the closest sister group to Metazoa. However, molecular phylogeny itself does not reveal the  
78 nature of ancestral states, it only provides a scaffolding on which they might be inferred from  
79 other data. The evolutionary positions of the other unicellular holozoans (filastereans,  
80 ichthyosporeans, and *Corallochytrium*) are less clear and sometimes controversial (e.g. Cavalier-  
81 Smith, Chao, 2003; del Campo, Ruiz-Trillo, 2013; Hehenberger et al., 2017; Medina et al., 2003;  
82 Ruiz-Trillo et al., 2008; Shalchian-Tabrizi et al., 2008; Torruella et al., 2012, 2015;).

83 As noted above, many molecular traits that were thought to be “animal-specific” are now  
84 known to be present in unicellular holozoans, while conversely the loss of other traits have been  
85 shown to correlate with the origin of the animals. But gene content alone is not sufficient to  
86 provide a comprehensive understanding of the cell biology, life cycle and regulation capabilities  
87 of the unicellular ancestor, it requires also analysis of the biology of the extant unicellular  
88 relatives of animals (Sebé-Pedrós et al., 2017).

89 Recently we described a phylogenomic and transcriptome analyses of three novel  
90 unicellular holozoans (Hehenberger et al., 2017), which are very similar in morphology and life  
91 style but not closely related. *Pigoraptor vietnamica* and *Pigoraptor chileana* are distantly related  
92 to filastereans, and *Syssomonas multiformis* forms a new phylogenetic clade, “Pluriformea”, with  
93 *Corallochytrium*. Both new genera of unicellular holozoans form the shortest and most slowly  
94 evolving branches on the tree, which improved support for many nodes in the phylogeny of  
95 unicellular holozoans. Also, comparison of gene content of the new taxa with the known  
96 unicellular holozoans revealed several new and interesting distribution patterns for genes related  
97 to multicellularity and adhesion (Hehenberger et al., 2017).

98 Here we report the detailed morphological and ultrastructural analyses of these new  
99 species, as well as describing their life cycle in culture, which are important implications for  
100 understanding the origin of animals as are the genetic analyses. All three species are shown to be  
101 predatory flagellates that feed on large eukaryotic prey, which is very unusual for unicellular  
102 Holozoa. They also appear to exhibit complex life histories with several distinct stages,  
103 including interesting multicellular structures that might offer important clues as to precursors of

104 multicellularity. On the basis of these findings we discuss the current hypotheses about the origin  
105 of multicellular animals from their unicellular ancestors.

106

## 107 **Results and discussion**

108

109 Detailed morphological descriptions of the cells and their aggregates are presented below.

110

111 *Syssomonas multiformis* Tikhonenkov, Hehenberger, Mylnikov et Keeling 2017

112

### 113 **Morphology and life cycle**

114 The organism is characterized by a large variety of life forms including flagellates,  
115 amoebflagellates, amoeboid non-flagellar cells, and spherical cysts. The most common stage in  
116 the life cycle, a swimming flagellate cell, resembles a typical opisthokont cell, reminiscent of  
117 sperm cells of most animals and zoospores of the chytrid fungi. Cells are round-to-oval and  
118 propel themselves with a single, long posterior flagellum (Fig. 1A-C, X). The flagellum is  
119 smooth and emerges from the middle-lateral point of the cell, turns back and always directs  
120 backward during swimming. The cell rotates during swimming (Video 1). Flagellar beating can  
121 be very fast, which can create the appearance of two flagella. Motile flagellates can suddenly  
122 stop and change the direction of movement. The flagellated cells measure 7-14  $\mu\text{m}$  in diameter.  
123 The flagellum length is 10-24, rarely 35  $\mu\text{m}$ . Cyst diameter is 5  $\mu\text{m}$  (Fig. 1D, Y).

124 Solitary cells of *Syssomonas* can temporarily attach to the substrate by the anterior part of  
125 the cell body. They produce water flow by rapid flagellum beating posteriorly and in that state  
126 resemble cells of choanoflagellates or choanocytes from sponges (Fig. 1E, Video 2). Floating  
127 flagellated cells can also move to the bottom and transform to amoebflagellates (Fig. 1J, Video  
128 3) by producing both wide lobopodia and thin short filopodia. Flagellar beating becomes slower  
129 and then stops. Amoebflagellates crawl along the surface using their anterior lobopodia and can  
130 take up clusters of bacteria. The organism can lose the flagellum via three different modes: the  
131 flagellum may be abruptly discarded from its proximal part of the cell; a stretched flagellum may  
132 be retracted into the cell; the flagellum may convolve under the cell-body and then retract into  
133 the cell as a spiral (Video 4). As a result *Syssomonas* turns into an amoeba (Fig. 1K,L, Video 4).  
134 Amoeboid cells produce thin, relatively short filopodia and sometimes have two contractile  
135 vacuoles. Amoeboid cells are weakly motile. The transformation of amoebflagellates and  
136 amoebae back to flagellates was also observed.

137 Amoeboid cells can also retract their filopodia, become roundish and transform into a cyst  
138 (Fig. 1D, Video 5). Palintomic divisions may occur inside the cyst and up to 16 (2, 4, 8, or 16)

139 flagellated cells are released as a result (Fig. 1M, Video 6). Division into two cell structures was  
140 also observed in culture (Video 7), but it is hard to tell whether a simple binary longitudinal  
141 division of a *Syssomonas* cell with retracted flagellum has taken place, or the final stage of a  
142 division inside the cyst has been observed.

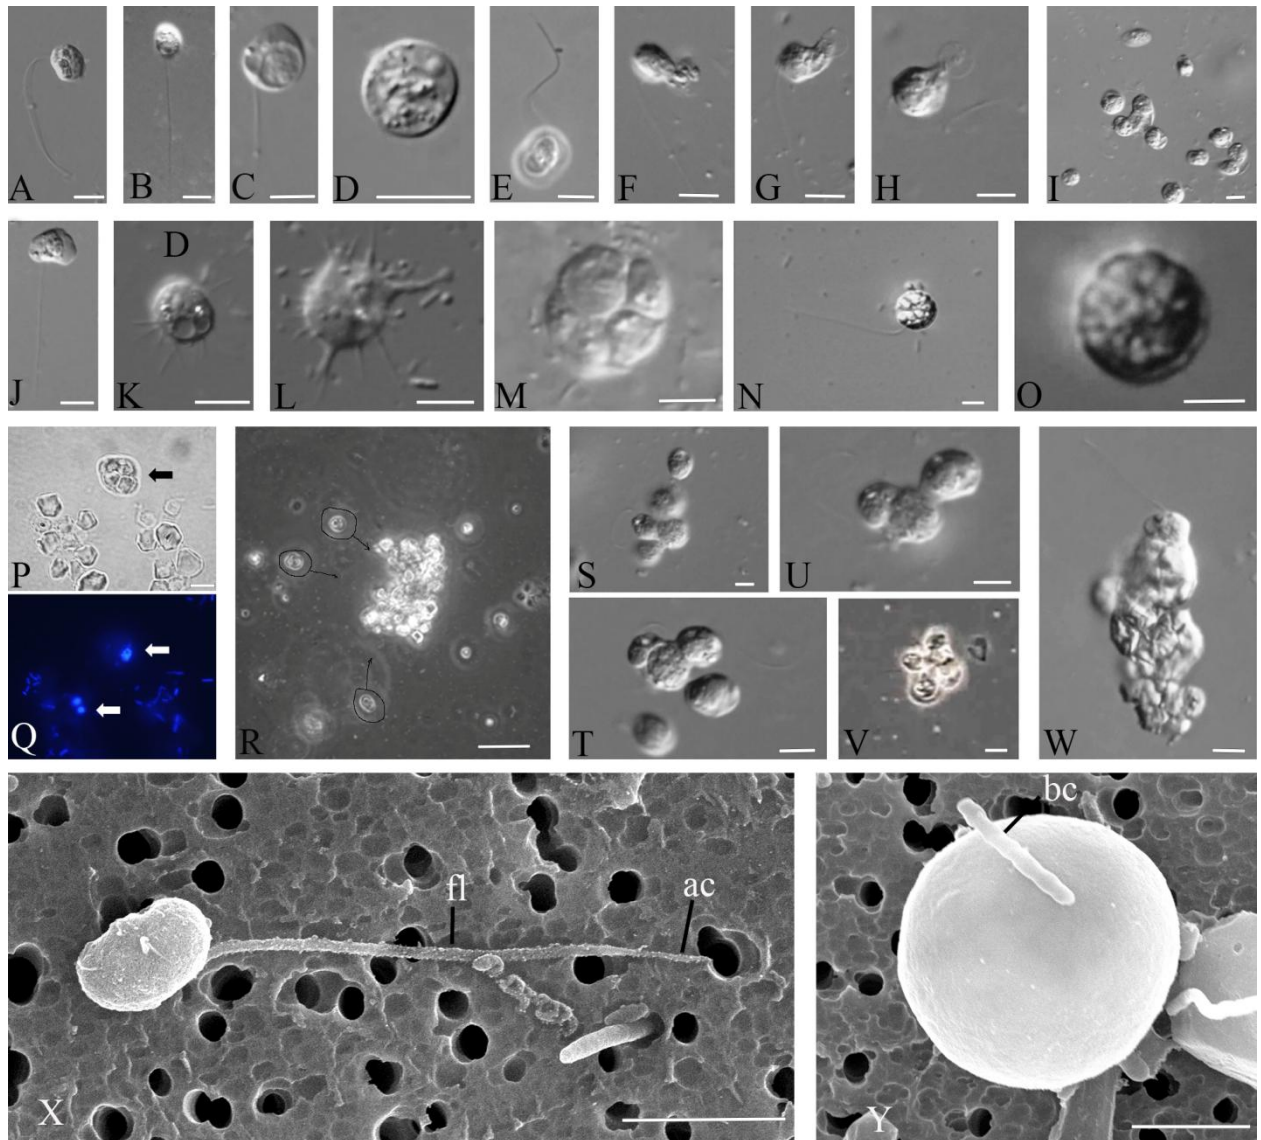

143

144 Fig.1. External morphology and life forms of *Syssomonas multififormis*. A-C – swimming  
145 flagellated cells; D – cyst; E – attached flagellated cell; F-H – sucking of eukaryotic prey; I –  
146 simultaneous joint feeding of three cells of *Syssomonas* on one prey cell with attraction of other  
147 specimen to the feeding spot; J – amoeboflagellate; K,L – amoeboid cell; M – palintomic cell-  
148 division inside the cyst; N – cell with inside vesicles; O – cyst with vesicles; P,Q – cells of  
149 *Syssomonas* engulfed starch granules (bright field (P) and fluorescent microscopy, DAPI  
150 staining); R – cells of *Syssomonas* with engulfed starch granules hiding into the starch druse, S-  
151 U, W – cell aggregations of *Syssomonas* near the bottom of Petri dish; V – floating aggregation  
152 of flagellated cells; X – general view of flagellated cell (SEM), Y – cyst (SEM). Scale bars: A-P,  
153 S-W – 10  $\mu$ m, R – 100  $\mu$ m, X – 3  $\mu$ m, Y – 2  $\mu$ m.

154

155 Floating, flagellated cells containing vesicular structures were observed (Fig. 1N, Video 8),  
156 however the process of formation and the purpose of these vesicles is unknown. After some time

157 such cells lose their flagellum and transform into vesicular cysts with a thick cover (Fig. 1O).  
158 Division inside vesicular cysts was not observed within 10 days of observation. Such structures  
159 could represent resting cysts or dying cells containing autophagic vacuoles (the partial  
160 destruction of one such cyst was observed after 4 days of observation, see Video 8).

161 The organism is a predator; it takes up other flagellates (e.g. *Parabodo caudatus* and  
162 *Spumella* sp.) which can be smaller, about the same size, or larger than *Syssomonas*. But in  
163 contrast to many other eukaryotrophic protists, *Syssomonas* does not possess any extrusive  
164 organelles for prey hunting. After initial contact, *Syssomonas* attaches to the prey cell and sucks  
165 out their cytoplasm (without ingesting the cell membrane) (Fig. 1F-H, Video 9). The organism  
166 feeds better on inactive, slow moving or dead cells and can also capture intact prey cells and  
167 cysts by means unobserved. After attaching to the prey, many other *Syssomonas* cells become  
168 attracted to the same prey cell (likely by chemical signaling) and try to attach to it. Joint feeding  
169 was observed: several cells of *Syssomonas* can suck out the cytoplasm of the same prey cell  
170 together (Fig. 1I, Video 9).

171 In culture, *Syssomonas* can take up starch granules from rice grains, the granules can be the  
172 same size as the cells (Fig. 1P,Q). In the presence of *Syssomonas* cells, rice grains in Petri dishes  
173 crumble into small fragments and separate granules of starch (Fig. S1). Cells of *Syssomonas* with  
174 engulfed starch granules can hide within the starch druses and lose the flagellum (Fig. 1R).  
175 Numerous cysts integrated into the starch matrix were often observed in culture.

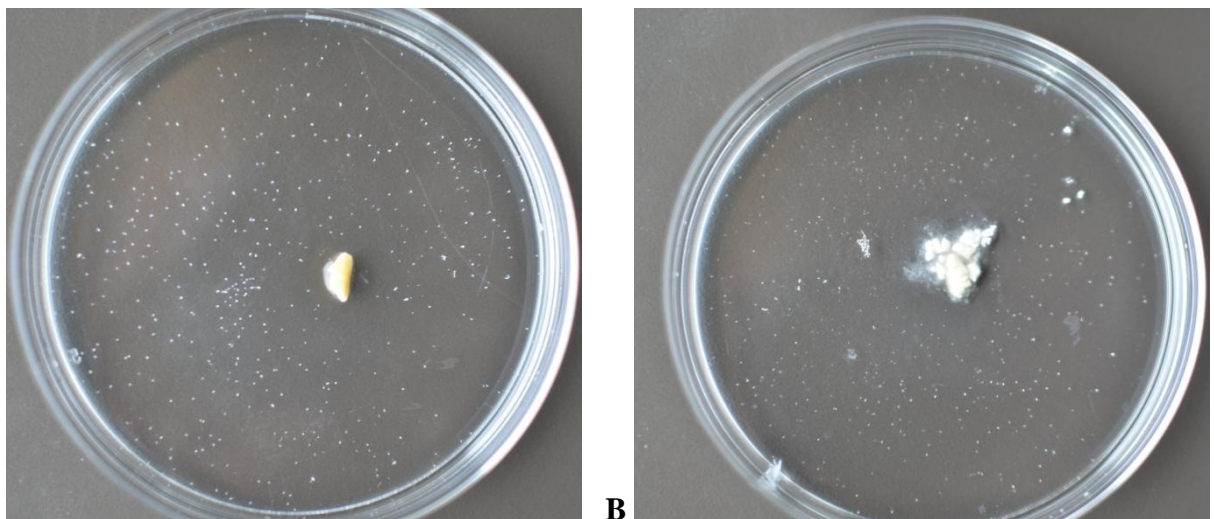

176 **A**  
177 Fig. S1. Rice grain destruction in Petri dish with Pratt medium and presence of the cells of  
178 *Parabodo caudatus* (prey) only (A) and *Syssomonas multififormis* (B) after 9 days of  
179 incubation.  
180

181 The organism can also feed on clusters of bacteria (Video 10) using short pseudopodia.  
182 After feeding, *Syssomonas* cells become 2-3 times bigger and a large food vacuole is formed at  
183 the posterior end of the cell-body (Fig. 1C). In the absence of eukaryotic prey (cultivation on

184 bacteria and/or rice grain/starch only), *Syssomonas* either dies or forms resting cysts. Bacteria  
185 alone are not sufficient food for *Syssomonas*.

186 Solitary cells of *Syssomonas* can partially merge and form temporary cell aggregations.  
187 They are usually shapeless, observed near the bottom, and consist of about 3-10 flagellated or  
188 non-flagellated cells (Fig. 1S-U, Video 11). Another type of aggregation is formed by only  
189 flagellated cells with outwards-directed flagella that can float in the water column and resemble  
190 the rosette-like colonies of choanoflagellates (Fig. 1V, Video 12). Both types of aggregations  
191 break up easily and it seems that the membranes of such aggregated cells are not fused.

192 However, in rich culture, solitary cells of *Syssomonas* can sometimes merge completely at  
193 the bottom of the Petri dish and form syncytium-like (or pseudoplasmodium) structures (it seems  
194 that nuclei do not merge after cell fusion). The budding of young flagellated daughter cells from  
195 such syncytia was observed (Video 13). Such syncytial structures with budding daughter cells  
196 have not been observed in other eukaryotes, to our knowledge, but multinucleated structures  
197 arising as a result of multiple cell aggregations or fusions of uninuclear cells are also known in  
198 Dictyostelia (Eumycetozoa) and *Copromyxa* (Tubulinea) in the Amoebozoa (sister group of  
199 Opisthokonta), as well as in other protists, such as Acrasidae in the Excavata, *Sorogena* in the  
200 Alveolata, *Sorodiplophrys* in the Stramenopiles, and *Guttulinopsis* in the Rhizaria (Brown et al.,  
201 2012). Within the opisthokonts, aggregation of amoeboid cells is only known in the sorocarpic  
202 species *Fonticula alba* (Holomycota) (Brown et al., 2009). We should also note that a syncytium  
203 is not an unusual cell structure in many fungi and animals; e.g. most of the cytoplasm of glass  
204 sponges (Hexactinellida), the teguments of flatworms as well as the skeletal muscles and the  
205 placenta of mammals (Gobert et al., 2003; Leyset al., 2006) have a syncytial structure.

206 In *Syssomonas*, the processes of cells merging attracts (again, likely by chemical  
207 signalling) many other cells of *Syssomonas*, which actively swim near aggregates or syncytium-  
208 like structures and try to attach to them. Some of these cells succeed to merge and the  
209 aggregates grow.

210 All aggregations and syncytial-like structures do not seem to form by cell division, but  
211 rather by a merger of the population of cells in the culture (although all cells in the clonal culture  
212 are offspring of a single cell of *Syssomonas*).

213 All of the above-described life forms and cellular changes do not represent well-defined  
214 phases of the life cycle of *Syssomonas*, but rather embody temporary transitions of cells in  
215 culture which are reversible.

216 *Syssomonas* grows at room temperature (22°C) and can survive at temperatures from +5 to  
217 36 °C. At high temperature (30-35 °C) the prey cells (bodonids) in culture become immobile and  
218 roundish; *Syssomonas* actively feeds on such easily accessible cells, multiplies and produces

219 high biomass. In the absence of live eukaryotic prey, increasing the incubation temperature does  
220 not lead to an increase in cell numbers. The cells grow at pH values from 6 to 11. Agitation of  
221 culture does not lead to the formation of cell aggregates as was observed in the filasterean  
222 *Capsaspora* (Sebé-Pedrós et al., 2013b).

223

## 224 **Cell ultrastructure**

225 The cell is naked and surrounded by the plasmalemma. The naked flagellum ends in a  
226 short, narrowed tip – the acroneme (Fig. 1X, 2D). A single spiral or other additional elements  
227 (e.g. a central filament typical for choanoflagellates) in the transition zone of the flagellum were  
228 not observed (Fig. 2B, 2C). The flagellar axoneme has an ordinary structure (9+2) in section (not  
229 shown). The flagellum can be retracted into the cell (Fig. 2E). A cone-shaped rise at the cell  
230 surface around the flagellum base was observed (Fig. 2B, 2C). The flagellar transition zone  
231 contains a transversal plate which is located above the cell surface (Fig. 2B).

232 Two basal bodies, one flagellar and one non-flagellar (Fig. 2A–C), lie approximately at a  
233 45-90 degrees angle to each other (Fig. 2B, 2C). The flagellar root system consists of several  
234 elements. Arc-like dense material, representing satellites of the kinetosome, is connected with  
235 the flagellar basal body and initiates microtubules which run into the cell (Fig. 2F). Radial fibrils  
236 originate from the flagellar basal body (Fig. 3A-C, 3G) and resemble transitional fibres. At least  
237 two fibrils connect to the basal bodies (Fig. 2B). It can be seen from serial sections that  
238 microtubules originate near both basal bodies (Fig. 3 A–F). Dense (osmiophilic) spots are  
239 situated near the basal bodies and some of them initiate bundles of microtubules (Fig. 3 I,J,L).  
240 Microtubules originating from both basal bodies singly or in the form of a fan probably run into  
241 the cell (Fig. 2 B, Fig. 3F–K). One group of contiguous microtubules begins from the dense spot  
242 (Fig. 3L) and goes superficially close to the plasmalemma (Fig. 3 E,F,L).

243 The nucleus is 2.6  $\mu\text{m}$  in diameter, has a central nucleolus and is situated closer to the  
244 posterior part of the cell (Fig. 2 A, D, Fig. 4 H). The Golgi apparatus is of usual structure and is  
245 positioned close to the nucleus (Fig. 2B, Fig. 4A). The cell contains several mitochondria with  
246 lamellar cristae (Fig. 4 B–D). Unusual reticulate or tubular crystal-like structures of unknown  
247 nature were observed inside the mitochondria (Fig. 4C, D). A contractile vacuole is situated at  
248 the periphery of the cell and is usually surrounded by small vacuoles (Fig. 4E).

249 A large food vacuole is usually located posteriorly or close to the cell center and contains  
250 either remnants of eukaryotic prey, e.g. cells (paraxial flagellar rods are seen) or cysts (fibrous  
251 cyst envelope is seen) of *Parabodo caudatus*, or starch granules (Fig. 2A, Fig. 4F–H).  
252 Exocytosis occurs on the posterior cell end (Fig. 4I).

253 Thin filopodia are located on some parts of cell surface (Figs. 4D, 4J).



254 Storage compounds are represented by roundish (presumably glycolipid) granules 0.8  $\mu\text{m}$   
255 in diameter (Fig. 4 A,D,J).

256 A flagellum or flagellar axoneme, or two kinetosomes, as well as an eccentric nucleus,  
257 mitochondria with lamellate cristae and dense matrix, and a food vacuole with remnants of the  
258 prey cells are all visible inside cysts containing dense cytoplasm (Fig. 4K, L).

259 Extrusive organelles for prey hunting were not observed in any cell type.

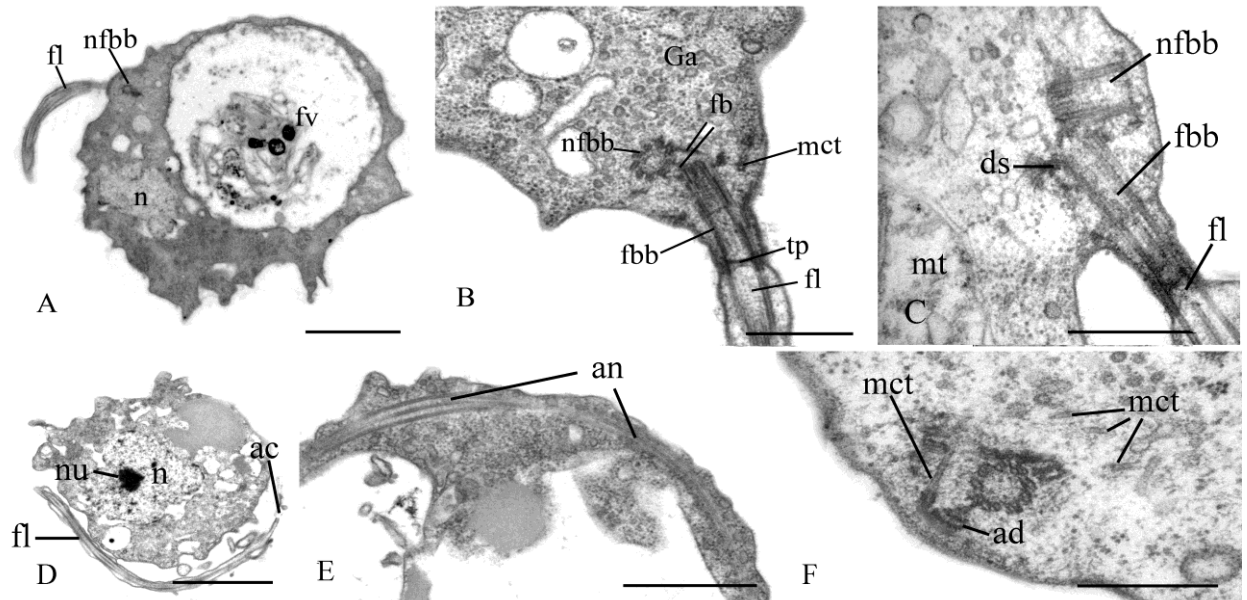

260  
261 Fig. 2. General view and flagellum structure of *Syssomonas multiformis* (TEM). A –  
262 general view of the cell section, B,C – arrangement of flagellum and basal bodies, D – twisting  
263 of the flagellum around the cell, E – retracted flagellum axoneme inside the cell, F – basal body  
264 of the flagellum and nearest structures.

265 ac – acroneme, ad – arc-like dense structure, an – flagellum axoneme, ds – dense spot, fb –  
266 fibril, fbb – flagellar basal body, fl – flagellum, fv – food vacuole, Ga – Golgi apparatus, mct –  
267 microtubule, mt – mitochondrion, n – nucleus, nfbb – non-flagellar basal body, nu – nucleolus,  
268 tp – transversal plate.

269 Scale bars: A – 2, B – 0.5, C – 0.5, D – 2, E – J – 0.5  $\mu\text{m}$ .

270

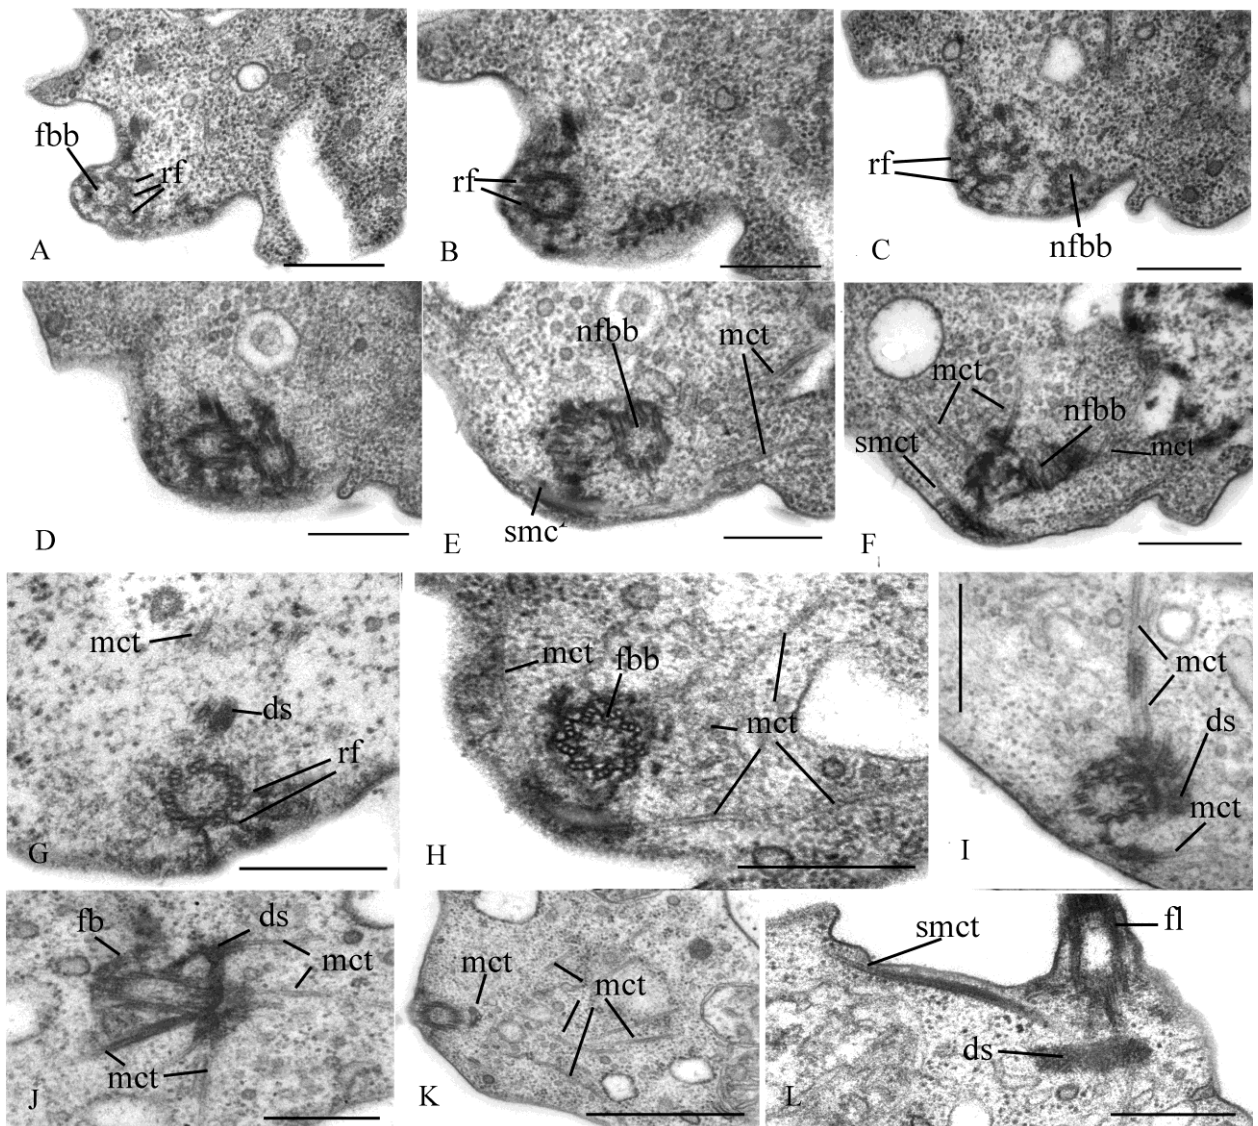

271  
272  
273  
274  
275  
276  
277

Fig. 3. Arrangement of kinetosomes of *Syssomonas multiformis*. A – F – serial sections of the kinetosomal area, G–L – structures nearby the kinetosomes.

ds – dense spot, fb – fibril, fbb – flagellar basal body, mct – microtubule, nfb – non-flagellar basal body, rf – radial fibrils, smct – submembrane microtubules.

Scale bars: A–J, L – 0.5, K – 1 μm.

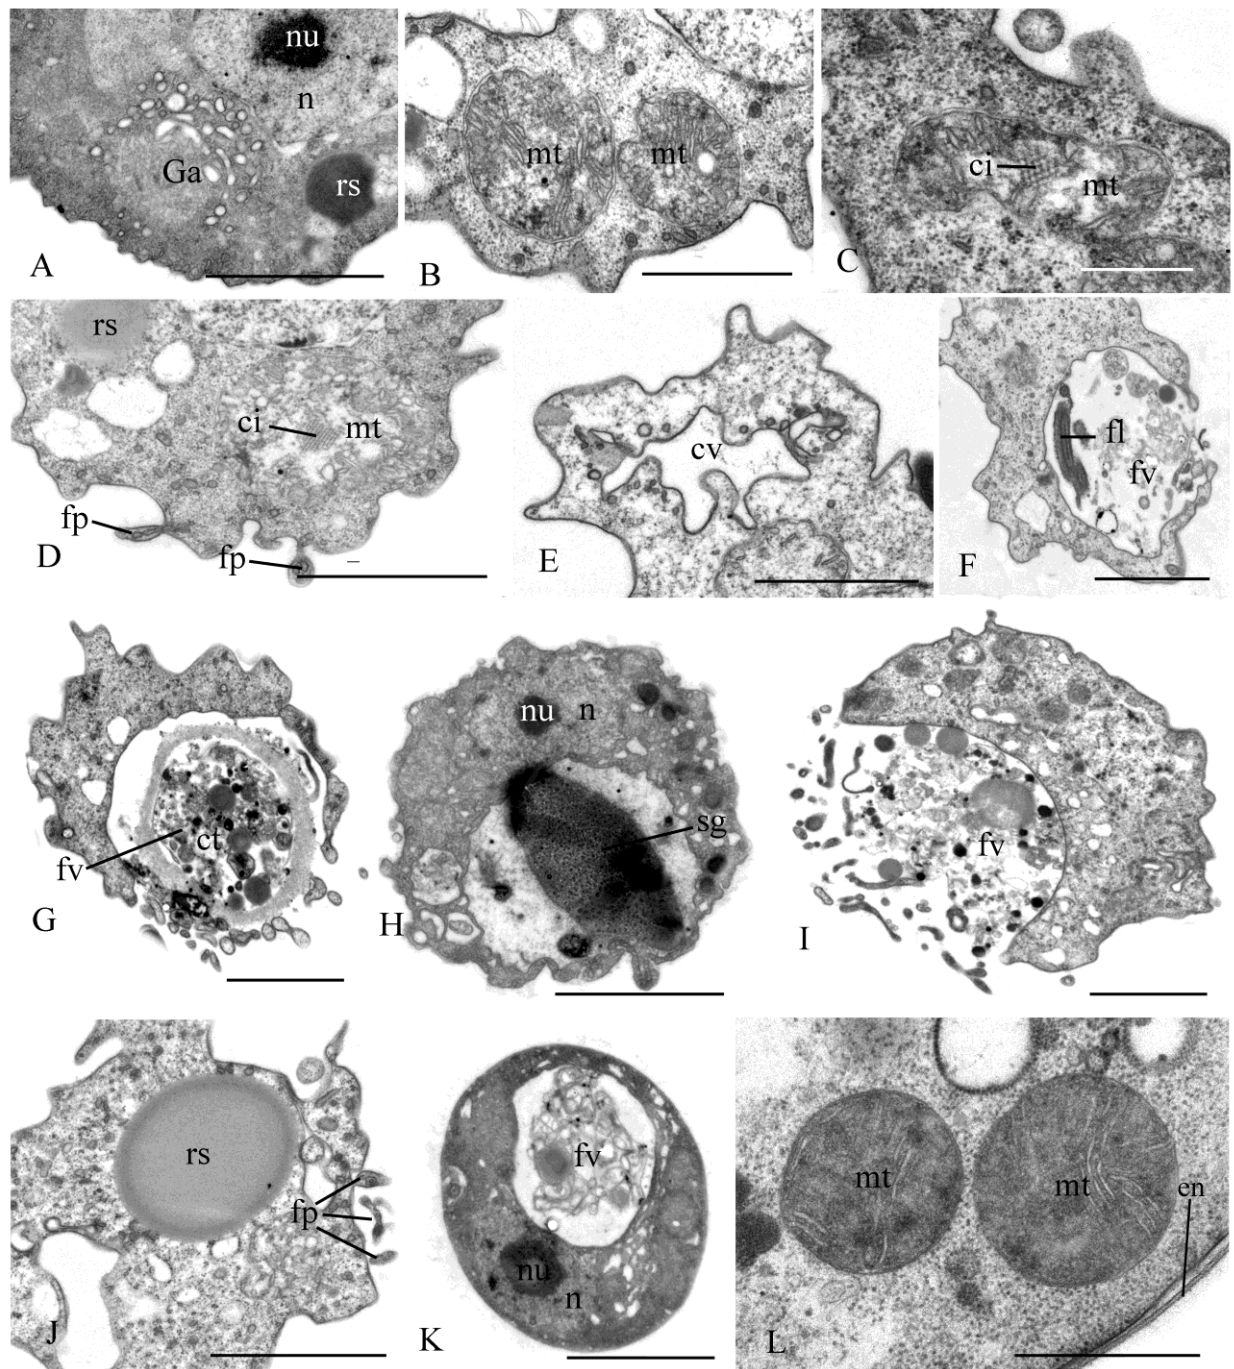

278

279

280

281

282

283

284

285

286

287

288

289

290

291

Fig. 4. Cell structures and organelles of *Syssomonas multififormis*. A – Golgi apparatus, B –  
 D – mitochondria, E – contractile vacuole, F – food vacuole with remnants of eukaryotic prey  
 (*Parabodo*), flagella and paraxial rods are seen, G – food vacuole containing cyst of *Parabodo*,  
 H – food vacuole containing starch granule, I – Exocytosis of food vacuole, J – reserve substance  
 and filopodia, K – L – cysts.

ci – crystalloid inclusion, ct – cyst of the prey cell, cv – contractile vacuole, en – cyst  
 envelope, fl – flagellum, fp – filopodia, fv – food vacuole, ga – Golgi apparatus, mt –  
 mitochondrion, n – nucleus, nu – nucleolus, rs – reserve substance, sg – starch granule.

Scale bars: A – 2, B – 1, C – 0.5, D – 2, E – 2, F – 2, G – 2, H – 2, I – 2, J – 2, K – 2, L – 1  
 µm.

292 *Pigoraptor vietnamica* Tikhonenkov, Hehenberger, Mylnikov et Keeling 2017

293

### 294 **Morphology and life cycle**

295 The uniflagellated, elongated-oval cells are 5-12  $\mu\text{m}$  long (Fig. 5 A,B,H,I). The flagellum  
296 length is 9-14  $\mu\text{m}$ . Saturated cells with a large food vacuole become roundish. The body plan,  
297 movement, feeding, and growth conditions of *Pigoraptor* are identical to *Syssomonas*  
298 *multiformis*, except for the feeding on starch granules, which was not observed in *Pigoraptor*.

299 The main stage of the life cycle is a swimming flagellated cell, which can form thin long,  
300 sometimes branching filopodia that can attach to the substrate (Fig. 5D). Wide lobopodia were  
301 also observed on some cells (Fig. 5E). Non-flagellate crawling amoebas were not observed.  
302 *Pigoraptor* cells can retract the flagellum and become roundish. After several hours, such  
303 spherical cells either divide into two daughter cells or turn into cysts (Fig. 5F), which stay intact  
304 for a long period. Binary division was observed also inside the cyst (Fig. 5G), resulting in two  
305 daughter cells that produce flagella and disperse.

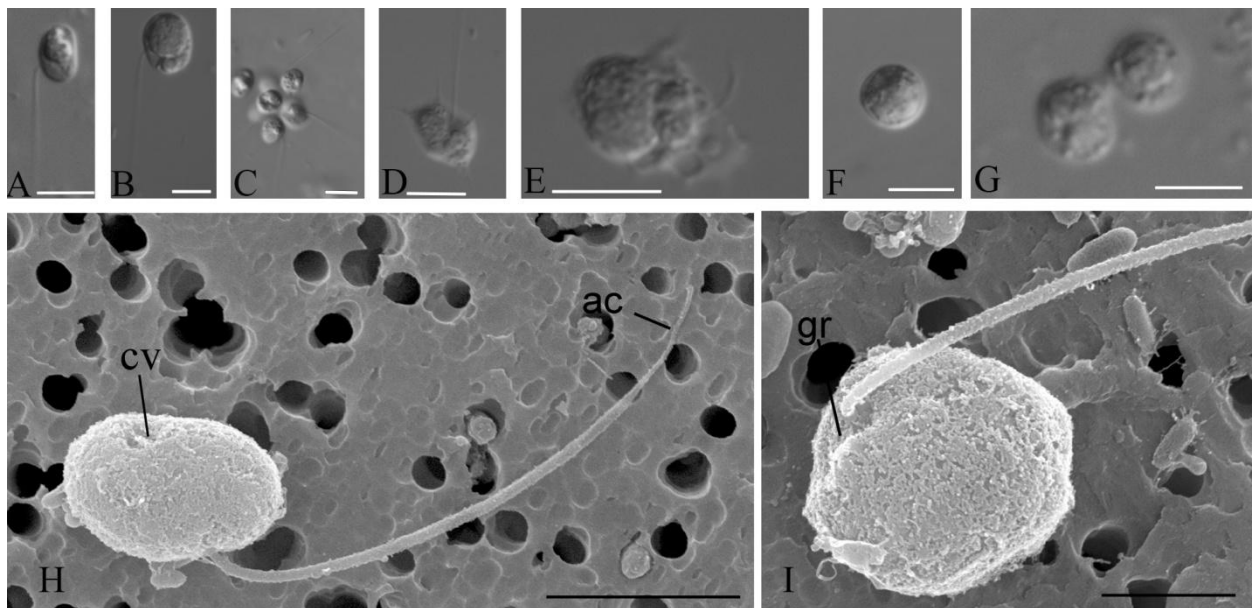

306

307 Fig. 5. External morphology and life forms of *Pigoraptor vietnamica*. A, B, H, I – general  
308 view of the cell (DIC and CEM); C – aggregation of flagellated cells; D – amoeboflagellate with  
309 filopodia; E – cell with lobopodia; F – cyst; G – binary division.

310

ac – acroneme, cv – contractile vacuole, gr – groove.

311

Scale bars: A-G – 10; H – 4, I – 2  $\mu\text{m}$ .

312

313 Cells of *Pigoraptor vietnamica* also form easily disintegrating aggregations (Fig. 5C) and  
314 feed jointly (Video 14). The adjacent cells can partially merge during feeding. These  
315 processes also seem to attract many other cells of *Pigoraptor*.

316

### 317 **Cell ultrastructure**

318 A single, naked flagellum with an acroneme originates from a small lateral groove and  
319 directs backward (Fig. 5 H,I). The cell is naked and surrounded by the plasmalemma. Two basal  
320 bodies, flagellar and non-flagellar, are located near the nucleus, lie approximately at a 90 degrees  
321 angle to each other and are not connected by visible fibrils (Fig. 6 A,B; Fig. 7 A,B; Fig. 8 A–F).  
322 The flagellum axoneme has an ordinary structure (9+2) in section (Fig. 6 D,E). A thin central  
323 filament, which connects the central pair of microtubules to the transversal plate, was observed  
324 (Fig. 6 C,F). The flagellum can be retracted into the cell (Fig. 9C). The flagellar root system is  
325 reduced. Radial fibrils arise from the flagellar basal body (Fig. 7C). Microtubules pass near the  
326 flagellar basal body (Fig. 7B, Fig. 8 E,F). Serial sections show that the non-flagellar basal body  
327 does not initiate the formation of microtubules (Fig. 8 A,B)

328 The roundish nucleus is about 1.5  $\mu\text{m}$  in diameter, contains a prominent nucleolus (Fig. 6  
329 A,B, Fig. 7A, Fig. 9 A, D), and is situated closer to the posterior end of the cell. Chromatin  
330 granules (clumps) are scattered within the nucleoplasm. The Golgi apparatus is adjacent to the  
331 nucleus (Fig. 9B). Cells contain several mitochondria that possess lamellar cristae (Fig. 9 A,C).  
332 Rare thin filopodia have been observed on the cell surface (Fig. 9 D,E). Cells usually contain one  
333 large food vacuole (Fig. 9F), which contains remnants of eukaryotic prey and bacteria.  
334 Exocytosis takes place on the anterior cell end (Fig. 9G). Storage compounds are represented by  
335 roundish (presumably glycolipid) granules 0.3-0.4  $\mu\text{m}$  in diameter (Fig. 6A, 7A, 9 C,H). Cells  
336 contain symbiotic bacteria, which are able to divide in the host cytoplasm (Fig. 9 H,I). A single  
337 contractile vacuole is situated close to the cell surface (not shown on cell sections but visualized  
338 by TEM, Fig. 5H).

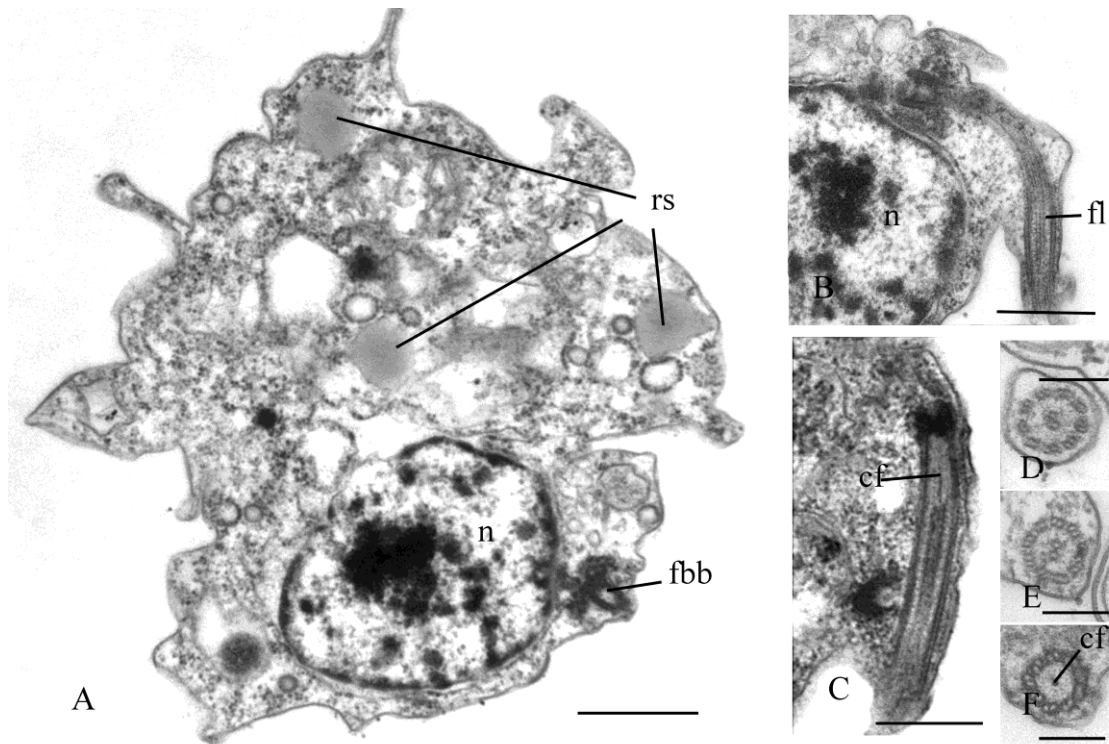

339  
340  
341  
342  
343  
344  
345  
346

Fig. 6. General view and flagellum structure of *Pigoraptor vietnamica*, TEM. A – longitudinal cell section. B–C – longitudinal section of flagellum, D–F – transverse flagellum sections in transitional area.

cf – central filament, fbb – flagellar basal body, fl – flagellum, n – nucleus, rs – reserve substance.

Scale bars: A – 1, B – 0.5, C – 0.5, D – F – 0.2 –  $\mu\text{m}$ .

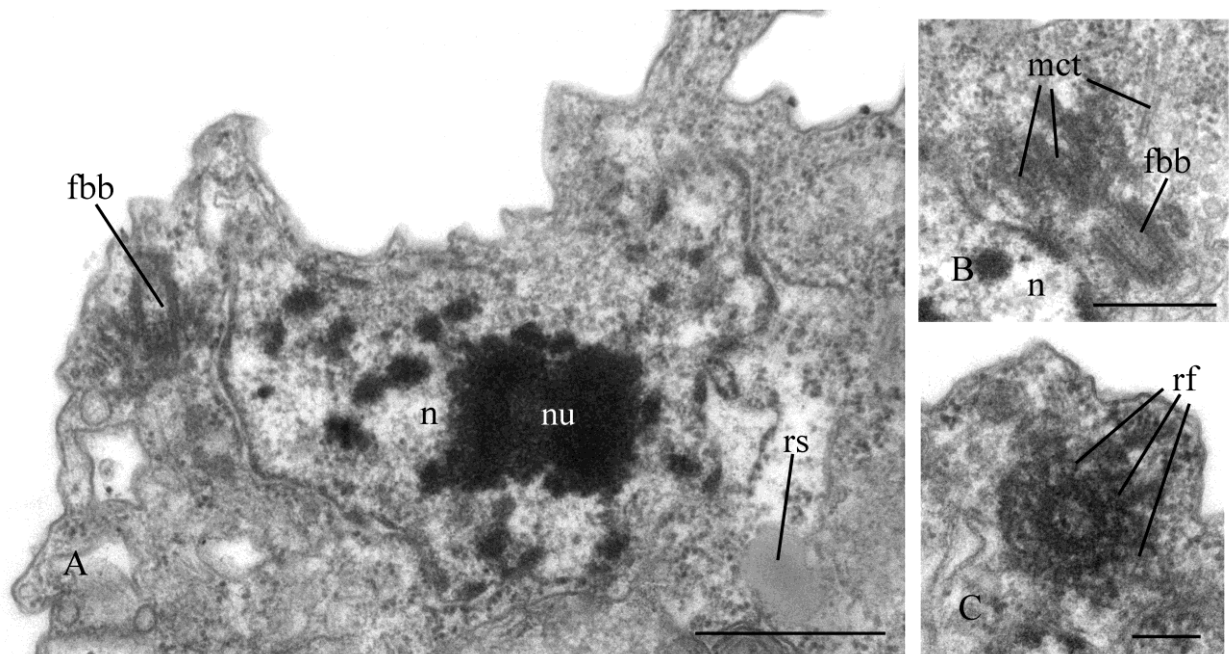

347  
348  
349  
350  
351  
352  
353  
354

Fig. 7. Nucleus and arrangement of basal bodies of *Pigoraptor vietnamica*. A – part of the cell containing nucleus and flagellar basal body, B – non-flagellar basal body, C – flagellar basal body and surrounding structures.

fbb – flagellar basal body, mct – microtubule, n – nucleus, nu – nucleolus, rf – radial fibrils, rs – reserve substance.

Scale bars: A – 0.5, B – 0.5, C – 0.2  $\mu\text{m}$ .

355

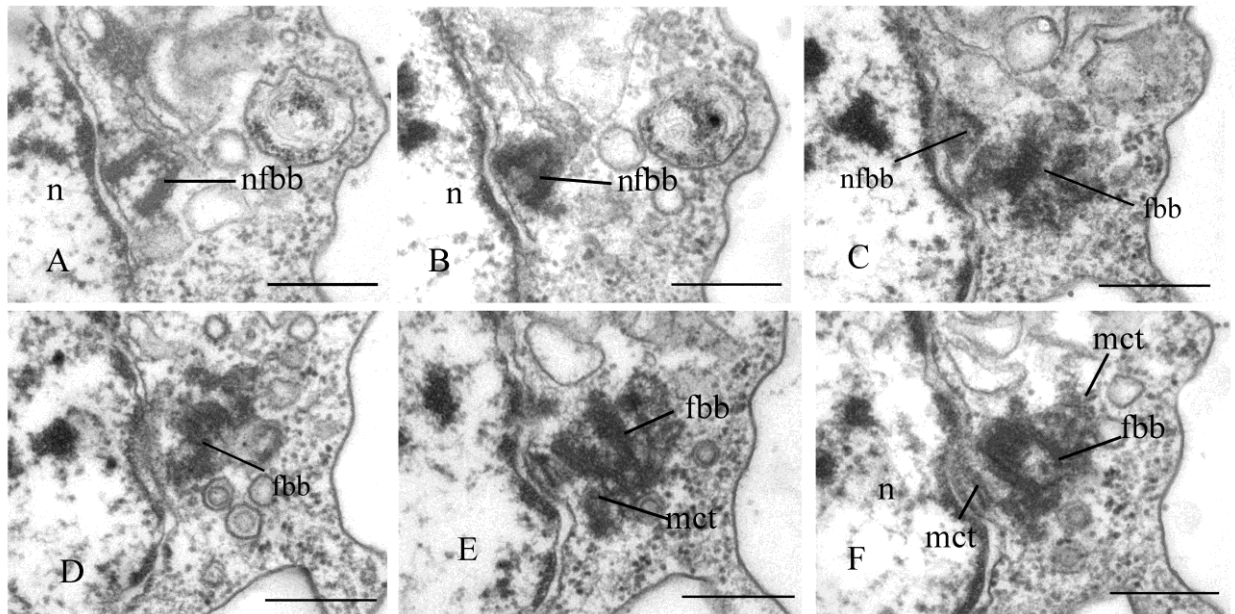

356

357

358

359

360

361

Fig. 8. Arrangement of two basal bodies of *Pigoraptor vietnamica* relative to one another. A – F – serial sections of basal bodies. fbb – flagellar basal body, mct – microtubule, n – nucleus, nfbb – non-flagellar basal body. Scale bars: A – F – 0.5  $\mu$ m.

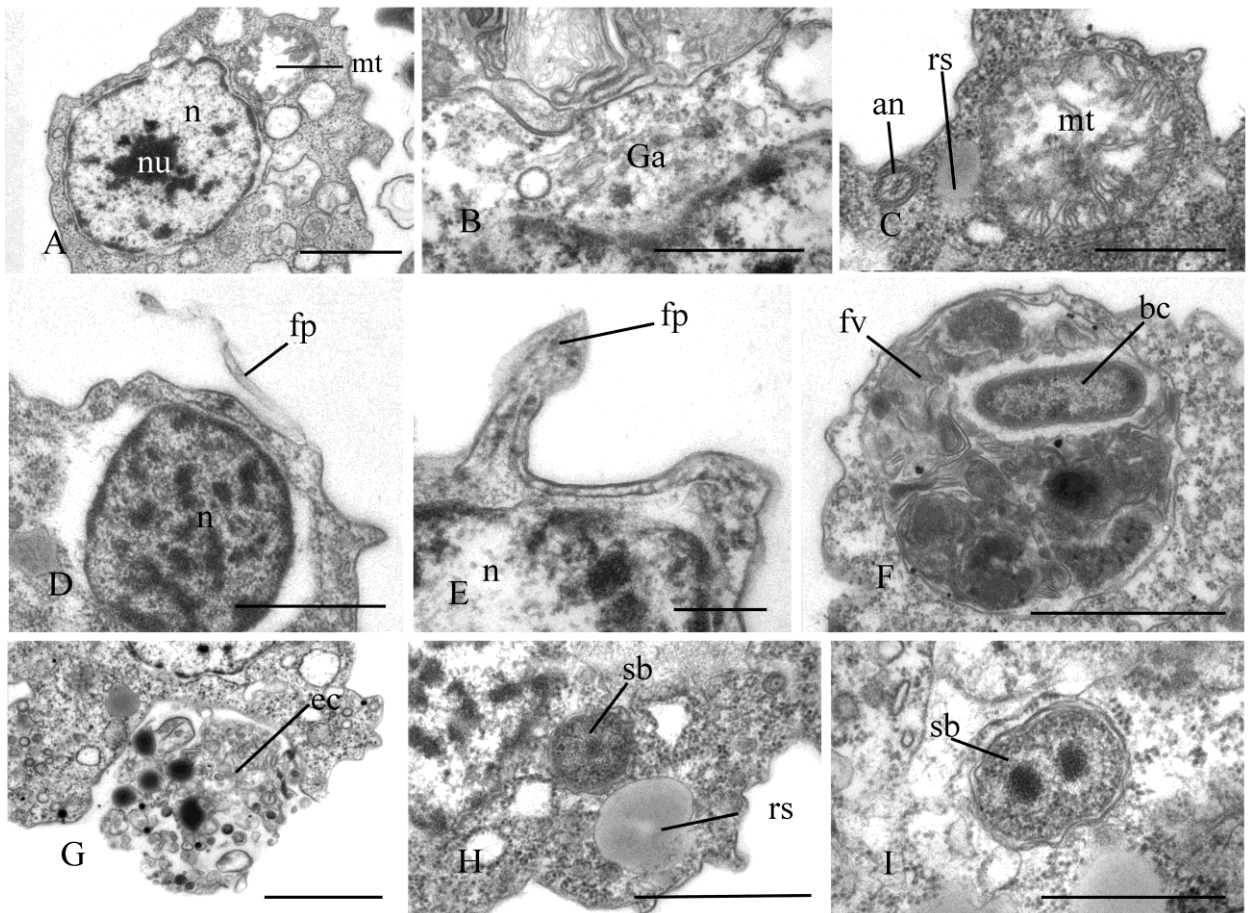

362

363

364

365

Fig. 9. Sections of nucleus and other cell structures of *Pigoraptor vietnamica*. A – nucleus, B – Golgi apparatus, C – mitochondrion, D – E – nucleus and filopodia, F – food vacuole, G – exocytosis, H – reserve substance, I – dividing symbiotic bacteria.

366 an – flagellar axoneme, bc – bacterium, ec – ectoproct, fb – filopodium, fv – food vacuole,  
367 ga – Golgi apparatus, mt – mitochondrion, n – nucleus, nu – nucleolus, rs – reserve substance, sb  
368 – symbiotic bacteria.

369 Scale bars: A – 1, B – 0.5, C – 0.5, D – 0.5, E – 0.2, F – 1, G – 1, H – 1, I – 0.5  $\mu\text{m}$ .

370

371 *Pigoraptor chileana* Tikhonenkov, Hehenberger, Mylnikov et Keeling 2017

372

### 373 Morphology and life cycle

374 The unflagellated, roundish cells measure 6-14  $\mu\text{m}$  in diameter. The flagellum emerges  
375 from a shallow groove and is 8-16  $\mu\text{m}$  in length (Fig. 10 A,B,H,I). The flagellum ends with the  
376 acroneme. This species is identical to *Pigoraptor vietnamica* in body plan, movement, feeding,  
377 growth conditions, joint feeding and aggregation behaviours (Fig. 10 C, Video 15, 16),  
378 encystation (Fig. 10 D), binary division (Fig. 10 E), but additionally characterized by the absence  
379 of symbiotic bacteria and much reduced capability to produce filopodia and lobopodia (Fig. 10  
380 F,G), which are extremely rare in *Pigoraptor chileana*.

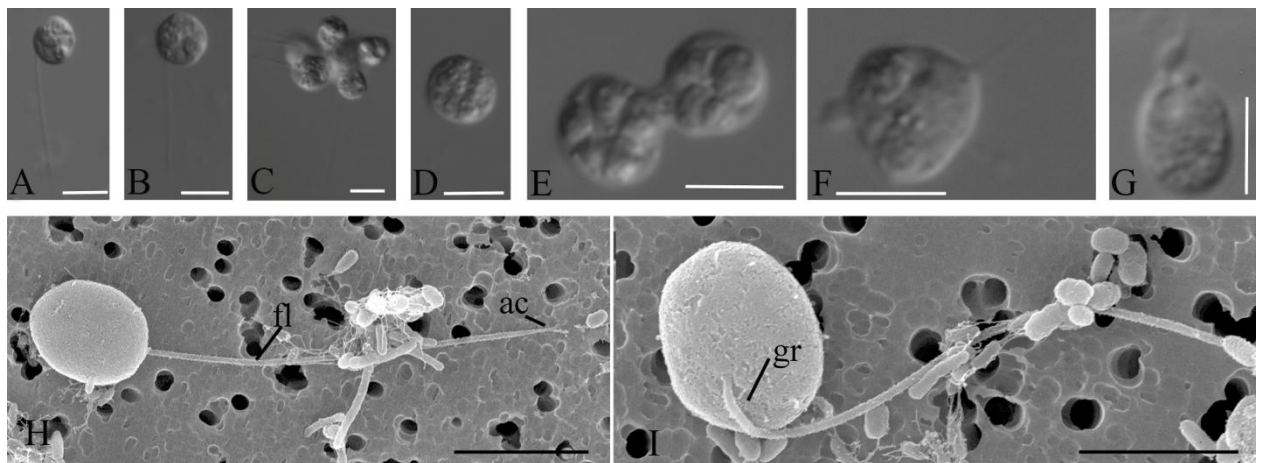

381

382 Fig. 10. External morphology and life forms of *Pigoraptor chileana*. A, B, H, I – general  
383 view of flagellated cell (DIC and SEM); C – cell aggregation; D – cyst; E – binary division; F,G  
384 – cell with short lobopodia and filipodia.

385 ac – flagella arconeme, gr – groove, fl – flagellum.

386 Scale bars: A-G – 10, H – 9, I – 4  $\mu\text{m}$ .

387

### 388 Cell ultrastructure

389 The cell is naked and surrounded by the plasmalemma. The nucleus is positioned close to  
390 the posterior cell end (Fig. 11 A). The flagellum is naked and the flagellar axoneme has an  
391 ordinary structure (9+2) in section (Fig. 11 B–D). The flagellum can be retracted into the cell  
392 which is visible in some sections (Fig. 11 A, C). Flagellar and non-flagellar basal bodies are  
393 located near the nucleus (Fig. 11 A) and lie approximately at a 60-90 degrees angle to each other  
394 (Fig. 12 A–F). The flagellar basal body contains a wheel-shaped structure in the proximal part  
395 (Fig. 11 E,F). Single microtubules and microtubule bundles are situated near this basal body  
396 (Fig. 11 E–H). Some microtubules arise from dense spots close to the basal body (Fig. 11 H).



397 Rare, thin, sometimes branching filopodia may contain superficially microtubule-like  
398 profiles (Fig. 12 G–I). The roundish nucleus is about 1.5  $\mu\text{m}$  in diameter and has a central  
399 nucleolus (Fig. 11A). Chromatin granules are scattered within the nucleoplasm. The Golgi  
400 apparatus was not observed. Mitochondria contain lamellar cristae and empty space inside (Fig.  
401 13 A, B). Cells usually contain one large food vacuole (Fig. 11A, Fig. 13 C), which contains  
402 remnants of eukaryotic prey and bacteria. Storage compounds are represented by roundish  
403 (presumably glycolipid) granules 0.2-0.4  $\mu\text{m}$  in diameter (Fig. 13 C). The single ultrathin section  
404 of the dividing cell (possible open orthomitosis) was obtained in metaphase stage (Fig. 13 D).  
405

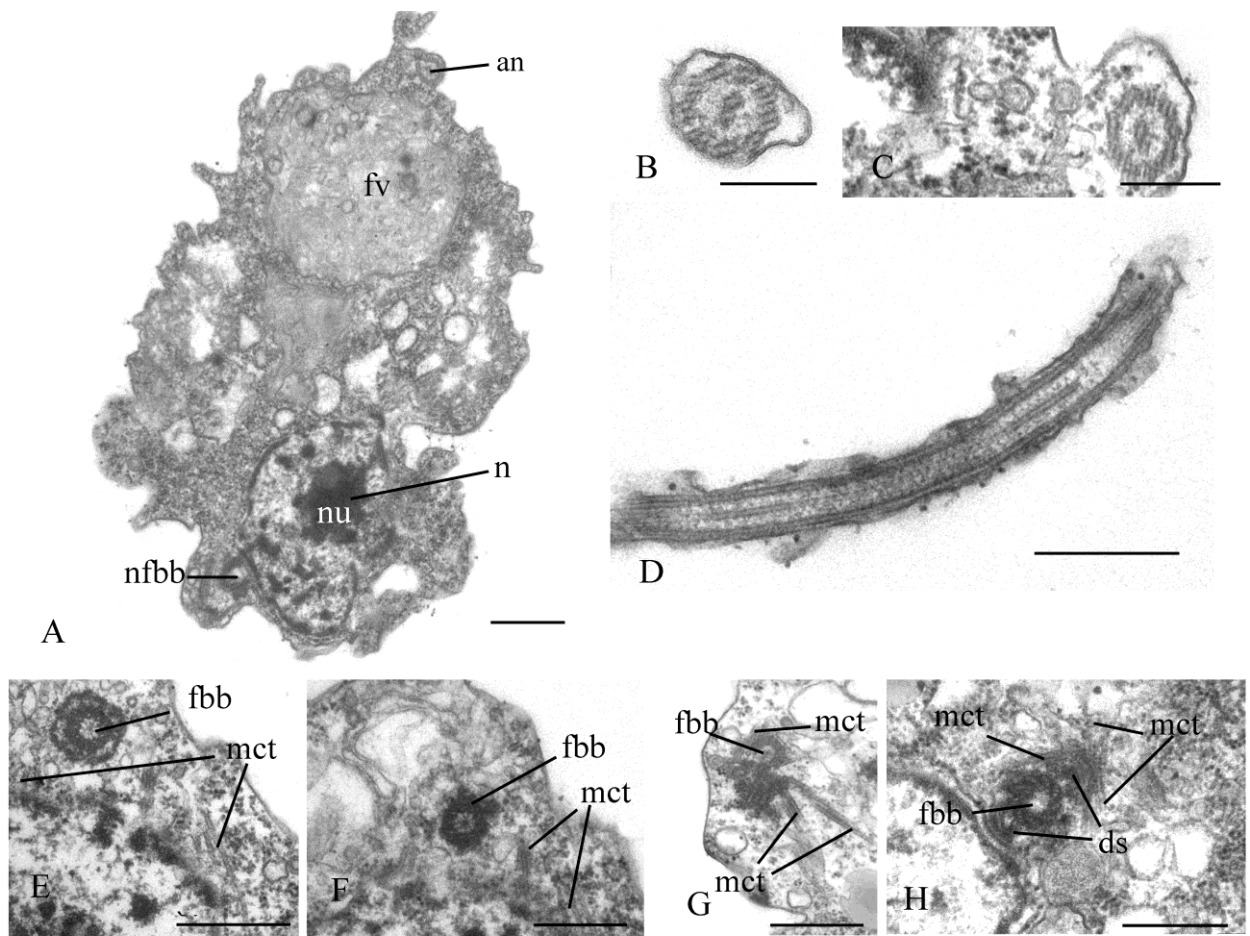

406  
407 Fig. 11. General view, flagellum and flagella root system of *Pigoraptor chileana*. A –  
408 general view of the cell section. B – D – flagellum, E– H – flagellar basal body and surrounding  
409 structures.

410 an – axoneme, ds – dense spot, fbb – flagellar basal body, fv – food vacuole, mct –  
411 microtubule, n – nucleus, nfbb – non-flagellar basal body, nu – nucleolus.

412 Scale bars: A – 0.5, B – 0.2, C – 0.2, D – 0.5, E – 0.5, F – 0.5, G – 0.5, H – 0.5  $\mu\text{m}$ .

413  
414

415

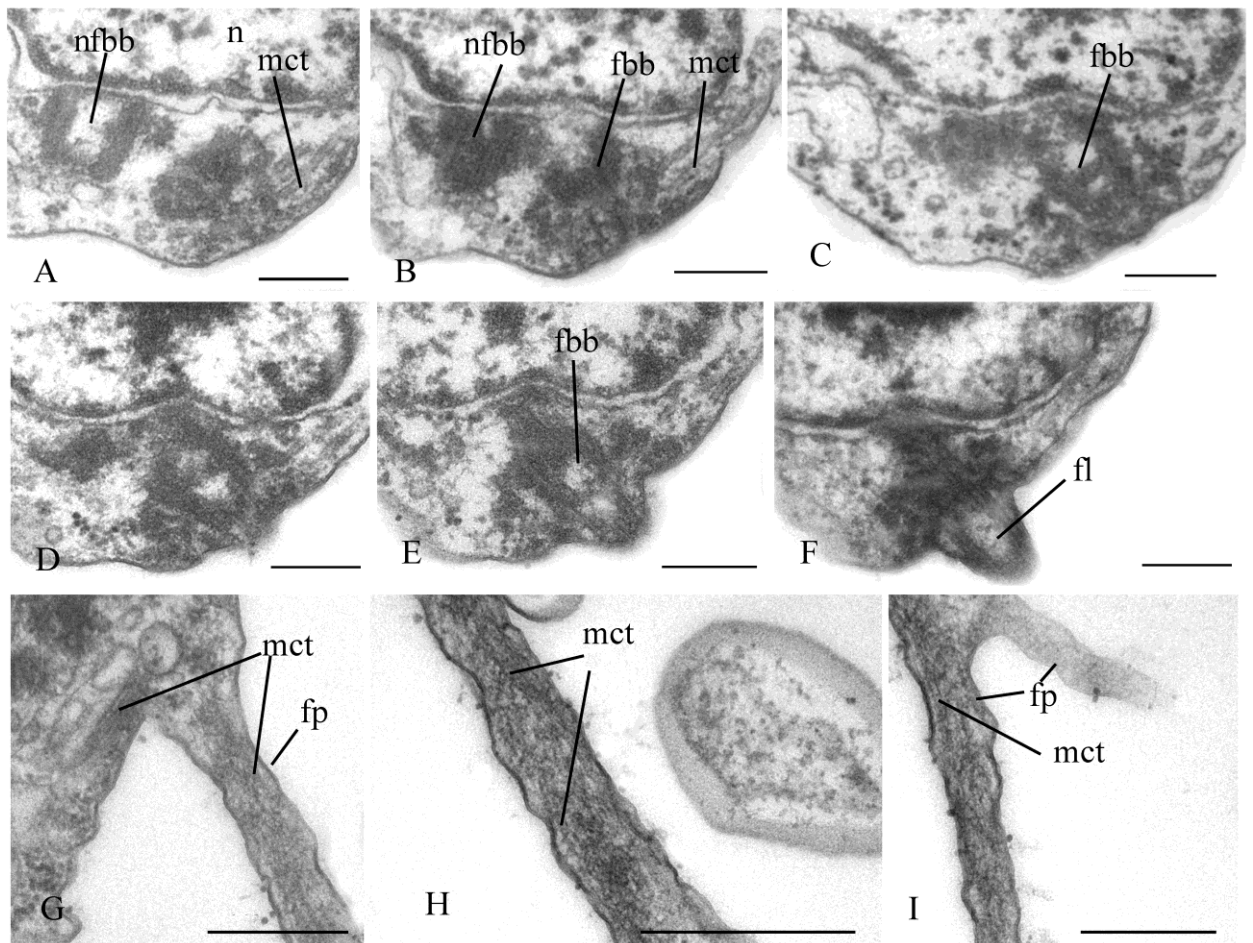

416

417

418

419

420

421

422

Fig. 12. Arrangement of basal bodies and structure of filopodia of *Pigoraptor chileana*. A – F – serial sections of basal bodies, G – I – filipodia.

fbb – flagellar basal body, fl – flagellum, fp – filopodium, mct – microtubule, n – nucleus, nfbf – non-flagellar basal body.

Scale bars: A – F – 0.2, G – I – 0.5  $\mu$ m.

423

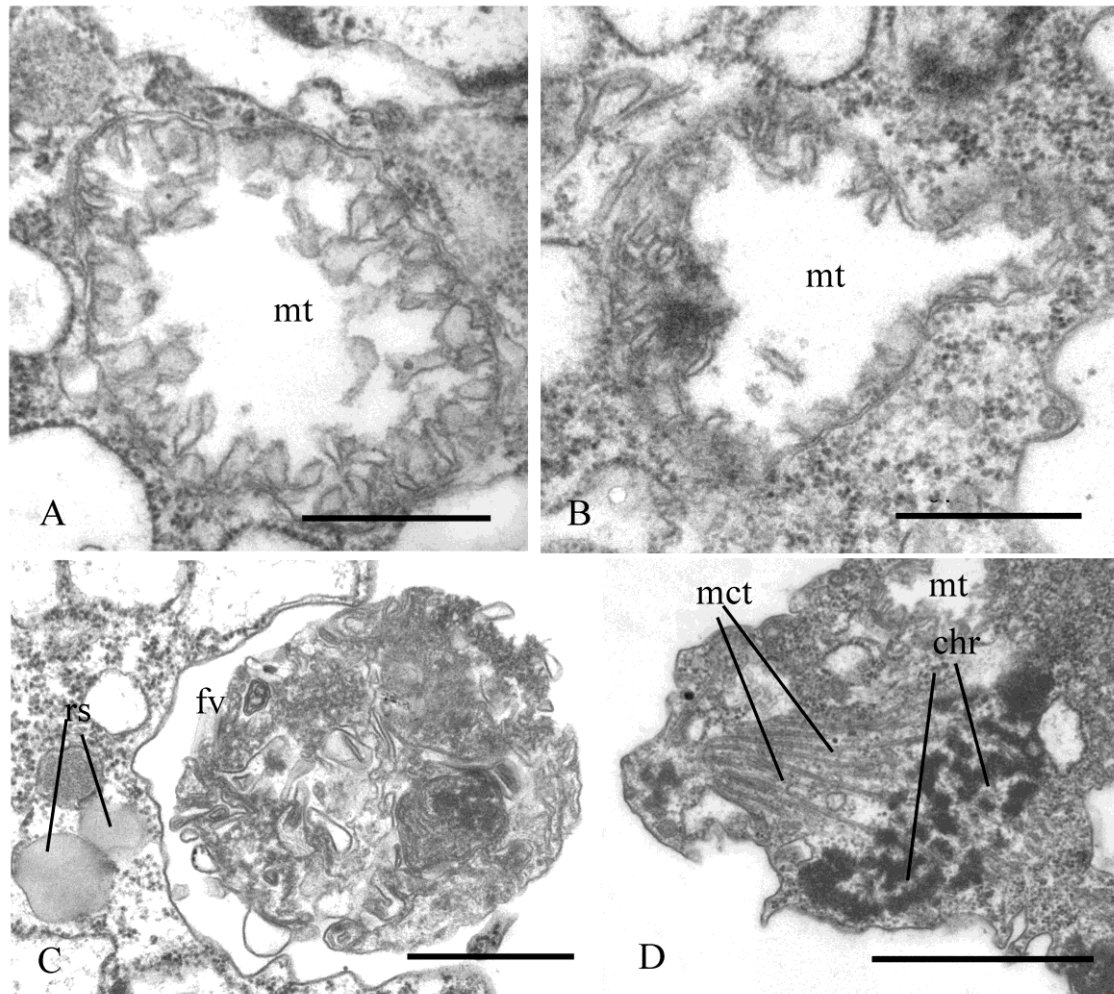

424

425

426

427

428

429

430

Fig. 13. Mitochondria, food vacuole and nucleus division of *Pigoraptor chileana*. A, B – mitochondria, C – food vacuole and exocytose, D – nucleus division in metaphase stage.

chr – chromosomes, fv – food vacuole, mct – microtubule, mt – mitochondrion, rs – reserve substance.

Scale bars: A – 0.5, B – 0.5, C – 0.5, D – 1  $\mu$ m.

431

### Key features of novel unicellular opisthokonts and origin of multicellularity in Metazoa

432

433

434

435

436

437

Our understanding of the origin and early evolution of animals has transformed as a result of the study of their most closely related sister groups of unicellular organisms: choanoflagellates, filastereans, and ichthyosporeans (King et al., 2008; Suga et al., 2013; Suga, Ruiz-Trillo, 2013). Our discovery of previously unknown unicellular Holozoa from freshwater bottom sediments in Vietnam and Chile provides new material for analysis.

438

#### *Eukaryotrophy*

439

440

441

442

A distinctive feature of all three new species is their feeding on eukaryotic prey of similar or larger size, which is unusual (if not unique) for unicellular Holozoa. While they consume entire prey cells or only the cytoplasmic contents of eukaryotic cells, which resembles the phagocytotic uptake of the contents of *Schistosoma mansoni* sporocysts by the filasterean

443 *Capsaspora owczarzaki* in laboratory conditions (Owczarzak et al., 1980), they can also feed on  
444 clusters of bacteria, resembling the phagocytic uptake of bacteria by choanoflagellates (Dayel,  
445 King, 2014). It is particularly noteworthy that the organisms we discovered, do not possess  
446 extrusive organelles for paralyzing and immobilizing the prey, which is typical for  
447 eukaryovorous protists. Our observations show that, prior to absorption, they somehow adhere to  
448 the surface of the prey cell. Studies on the choanoflagellate *Monosiga brevicollis* have shown  
449 that cadherins, that function as cell-cell adhesion proteins in animals, are located on the  
450 microvilli of the feeding collar and colocalize with the actin cytoskeleton (Abedin, King, 2008).  
451 *M. brevicollis* is non-colonial, thus suggesting that cadherins participate in prey capture, not  
452 colony formation. In addition, studies of the colonial choanoflagellate *Salpingoeca rosetta* did  
453 not indicate a role of the cadherins in colony formation, further supporting the notion that  
454 cadherins do not play a role in cell-cell adhesion between choanoflagellates, and perhaps also did  
455 not in the unicellular ancestor of animals (Seb e-Pedr os et al., 2017). In the case of the unicellular  
456 predators *Syssomonas* and *Pigoraptor*, adherence to a large and actively moving prey seems to  
457 be crucial for feeding and important for survival. Interestingly, the *Syssomonas* transcriptome  
458 does not include cadherin genes, but it does express C-type lectins (carbohydrate-binding  
459 proteins performing various functions in animals, including intercellular interaction, immune  
460 response and apoptosis). A reverse pattern of gene distribution is seen in *Pigoraptor*, where  
461 cadherin domain-containing transcripts were found but no C-type lectins (Hehenberger et al.,  
462 2017).

463 The presence of eukaryotrophy as a type of feeding within both filastereans and  
464 Pluriformea suggests that predation could be or have once been widespread among unicellular  
465 relatives of animals, and perhaps that the ancestor of Metazoa was able to feed on prey much  
466 larger than bacteria. The “joint feeding” we observed many times in cultures of *Syssomonas* or  
467 *Pigoraptor*, including the behaviour where cells are attracted to the large prey by other predators  
468 already feeding on it, is probably mediated by chemical signaling of the initially attached  
469 predator cell. The newly arriving cells also adhere to the plasmalemma of the prey, partially  
470 merging with each other and sucking out the contents of the large prey cell together. The  
471 merging of predator cells during feeding is quite unusual, and may represent a new factor to  
472 consider in the emergence of aggregated multicellularity. In addition, putative chemical  
473 signaling to attract other cells of its species is observed during the formation of syncytial  
474 structures in these species. In this context, alpha and beta-integrins and other components of the  
475 so-called integrin adhesome, which are responsible for interaction with the extracellular matrix  
476 and the transmission of various intercellular signals, were found in the transcriptomes of all three  
477 studied species (Hehenberger et al., 2017).

478

479 ***Starch breakdown by Syssomonas***

480 An interesting phenomenon was observed in clonal cultures of *Syssomonas*, where the  
481 predator can completely engulf starch granules of the same size as the cell, also mediating the  
482 rapid destruction of rice grains into smaller fragments and individual starch crystals (Fig. S1). It  
483 is possible that *Syssomonas* secretes hydrolytic enzymes that provide near-membrane  
484 extracellular digestion. Near-membrane extracellular digestion in animals is of great importance  
485 for the breakdown of various biopolymers and organic molecules (for example, in the intestinal  
486 epithelium of mammals in the zone of limbus strigillatus in the glycocalix layer).

487 This ability of *Syssomonas* to feed on starch is likely promoted by the expression of  
488 numerous enzymes that are putatively involved in starch breakdown (several  $\alpha$ -amylases and  $\alpha$ -  
489 glucosidases, a glycogen debranching enzyme and a glycogen phosphorylase) (Table 1). For  
490 example, *Syssomonas* has five distinct putative alpha-amylases, one of them not found in any  
491 other Holozoa present in our database (Table 1). Similarly, one of the four  $\alpha$ -glucosidases in *S.*  
492 *multiformis* seems to be specific to this lineage, and possibly the Filasterea, within the Holozoa.  
493 While  $\alpha$ -amylases and  $\alpha$ -glucosidases are able to hydrolyze  $\alpha$ -1,4-linked glycosidic linkages,  
494 mobilization of the starch molecule at the  $\alpha$ -1,6 glycosidic bonds at branch points requires the  
495 activity of debranching enzymes. A possible candidate for the catalysis of this reaction is a  
496 conserved glycogen debranching enzyme in *S. multiformis*, orthologous to the human *AGL* gene  
497 (Table 1). Additionally, we identified a transcript for a glycogen phosphorylase (orthologous to  
498 the human *PYGB*, *PYGL* and *PYGM* genes), an enzyme involved in the degradation of large  
499 branched glycan polymers.

500 Our observations also show that, in the presence of starch in culture, *Syssomonas* can  
501 form resting stages of unidentified genesis, which tend to adhere to each other and to starch  
502 grains.

503

504

505

506

507

508

509

510

511

512 Table 1. Transcripts for putative starch-degrading enzymes in *S. multiformis* and the  
 513 presence/absence of corresponding orthologs in other unicellular holozoan lineages/Metazoa.  
 514 Accession numbers for *S. multiformis* are from the corresponding TransDecoder output files as  
 515 described in Hehenberger et al., 2017. Pfam domains used to identify candidates in *S.*  
 516 *multiformis* and/or annotated direct human orthologous genes are indicated in brackets in column  
 517 1. NA, no direct orthologs recovered in our dataset; +, direct orthologs present in phylogeny; (+)  
 518 short fragment of one lineage representative.

|                                                   | <i>S. multiformis</i>                                                                                              | Ichthyosporea | Filasterea | Choanoflagellates | Metazoa |
|---------------------------------------------------|--------------------------------------------------------------------------------------------------------------------|---------------|------------|-------------------|---------|
| <b><math>\alpha</math>-amylases (PF00128)</b>     |                                                                                                                    |               |            |                   |         |
| 1.                                                | Colp12_sorted@267,<br>Colp12_sorted@268,<br>Colp12_sorted@269                                                      | +             | (+)        | +                 | NA      |
| 2.                                                | Colp12_sorted@19603                                                                                                | NA            | NA         | NA                | NA      |
| 3.                                                | Colp12_sorted@18987,<br>Colp12_sorted@16467,<br>Colp12_sorted@17178                                                | NA            | +          | +                 | +       |
| 4.= paralog to 3.                                 | Colp12_sorted@8715                                                                                                 | +             | +          | +                 | +       |
| 5. ( <i>SLC3A1</i> )                              | Colp12_sorted@10150                                                                                                | NA            | NA         | +                 | +       |
| <b><math>\alpha</math>-glucosidases (PF01055)</b> |                                                                                                                    |               |            |                   |         |
| 1.                                                | Colp12_sorted@9290,<br>Colp12_sorted@22295                                                                         | NA            | (+)        | NA                | NA      |
| 2.                                                | Colp12_sorted@1339,<br>Colp12_sorted@1341                                                                          | +             | +          | NA                | +       |
| 3.= paralog to 2.                                 | Colp12_sorted@9196,<br>Colp12_sorted@14409,<br>Colp12_sorted@18957,<br>Colp12_sorted@21457,<br>Colp12_sorted@31517 | +             | +          | NA                | +       |
| 4. ( <i>GANAB/GANC</i> )                          | Colp12_sorted@13767                                                                                                | +             | +          | +                 | +       |
| <b>glycogen phosphorylase (PYGB/PYGL/PYGM)</b>    |                                                                                                                    |               |            |                   |         |
| 1.                                                | Colp12_sorted@1564                                                                                                 | +             | +          | +                 | +       |
| <b>glycogen debranching enzyme (AGL)</b>          |                                                                                                                    |               |            |                   |         |
| 1.                                                | Colp12_sorted@14615                                                                                                | +             | +          | +                 | +       |

519  
 520  
 521  
 522  
 523  
 524  
 525

526            ***Structural features***

527            *Syssomonas* and *Pigoraptor* both display a broad morphological plasticity: all three  
528 species have a flagellar stage, form pseudopodia and cysts, and can form aggregations of several  
529 cells. *Syssomonas multiformis* also has an amoeboid non-flagellar stage. The dominating life  
530 form of all three species in culture is the uniflagellar swimming cell. Interestingly, amoeboid and  
531 pseudopodial life forms were detected in cultures only after two years of cultivation and  
532 observation, suggesting they may be extremely rare in nature. Overall, the morphological  
533 differences between cells of the same type of the two genera, *Syssomonas* and *Pigoraptor*, are  
534 few and subtle. Given these genera are distantly related within the tree of Holozoa, it is  
535 interesting to speculate that they may be the result of morphostasis and by extension retain  
536 features resembling those of an ancestral state of holozoan lineages.

537            It has been established that single cells of *Syssomonas* and *Pigoraptor* can temporarily  
538 attach themselves to the substrate and, by beating their flagellum, can create water currents to  
539 putatively attract food particles, similar to choanoflagellates and sponge choanocytes (Fig. 1 E,  
540 Video 2). Choanocytes and choanoflagellates possess, in addition to the flagellum, a collar  
541 consisting of cytoplasmic outgrowths reinforced with actin filaments (microvilli) that serve to  
542 capture bacterial prey. The thin filopodia that are observed on the cell surface of all three  
543 *Syssomonas* and *Pigoraptor* species may thus be homologous to collar microvilli. But this will  
544 require further evidence in form of homologous proteins in these structures or evidence of their  
545 function in *Syssomonas* and *Pigoraptor*. While the filopodia of *Syssomonas* have no obvious  
546 structural contents, the outgrowths of *Pigoraptor* sometimes contain microtubular-like profiles.  
547 Cross sections of these structures were not obtained, but they may represent parallel  
548 microfilaments such as recently found in the filopodial arms of *Ministeria vibrans* (Mylnikov et  
549 al., 2019). The organisation of the *Ministeria* filopodial arms in turn resembles the microvilli of  
550 choanoflagellates, which have stable bundles of microfilaments at their base. It has been  
551 proposed previously that the ancestor of Filozoa (Filasterea+Choanoflagellida+Metazoa)  
552 probably had already developed filose tentacles, which have aggregated into a collar in the  
553 common ancestor of choanoflagellates/sponges (Shalchian-Tabrizi et al., 2008), and that  
554 microvilli were present in the common ancestor of Filozoa (Mylnikov et al., 2019).

555            A single, posterior flagellum is the defining characteristic of opisthokonts (Cavalier-  
556 Smith, Chao, 2003). However, the flagellum has not yet been found in all known Opisthokonta  
557 lineages. Torruella et al. (2015) have found several proteins corresponding to key components of  
558 the flagellum in *Corallochytrium* and the filose amoeba *Ministeria vibrans*, which have been  
559 considered to lack flagella. The authors have shown that the stalk used by *Ministeria* to attach to  
560 the substrate is a modified flagellum. Recently, morphological observations on another strain of

561 *Ministeria vibrans* (strain L27; Mylnikov et al., 2019) revealed that this strain lacks the stalk for  
562 substrate attachment, but possesses a typical flagellum that projects forward and beats at attached  
563 to the substrate cells (see Fig. 2h and Video S1 in Mylnikov et al., 2019). The authors concluded  
564 that the filasterean ancestor possessed a flagellum, which was subsequently lost in *Capsaspora*  
565 *owczarzaki*. In the case of *Corallochytrium limacisporum*, it was suggested that it has a cryptic  
566 flagellate stage in its life cycle (Torruella et al., 2015), as has been proposed for other eukaryotes  
567 (*Aureococcus* and *Ostreococcus*, for instance) based on their genome sequences (Wickstead,  
568 Gull, 2012). Therefore, the flagellate stage could have been the one morphological trait uniting  
569 *Corallochytrium* and *Syssomonas* within “Pluriformea”. Interestingly, the ancestor of  
570 ichthyosporeans probably also had a flagellum, which is preserved in the Dermocystida (at the  
571 stage of zoospores), but was again lost in the Ichthyophonida.

572         The central filament of the flagellum, which connects the central pair of microtubules  
573 with the transversal plate in *Syssomonas* and *Pigoraptor*, is also noteworthy, since this character  
574 was previously known only in the choanoflagellates and was considered a unique feature for this  
575 lineage. The cone-shaped elevation of the surface membrane around the base of the flagellum in  
576 *Syssomonas* was also thought typical for choanoflagellates.

577

### 578         ***Origins of multicellularity***

579         As mentioned above, numerous theories about the origin of Metazoa exist. One of the  
580 first and widely accepted evolutionary theories on the origin of animals is the Gastrea theory of  
581 Ernst Haeckel (Haeckel, 1874). Based on the blastula and gastrula stages that various animals  
582 undergo during their embryonic development, Haeckel suggested that the first step in the  
583 evolution of multicellularity in animals was the formation of a hollow ball, the walls of which  
584 consisted of identical flagellated cells, which he called Blastea. This stage is followed by  
585 gastrulation, where the ball invaginated, leading to the primary cellular differentiation into ecto-  
586 and endoderm. In combination with modern theories, such as the choanoblastea theory, which  
587 highlights the similarity between Haeckel's Blastea and the choanoflagellate colony (Nielsen,  
588 2008), this model is still the most commonly used explanation for the origin of multicellular  
589 animals. An important assumption of the Gastrea theory is that cell differentiation took place  
590 only *after* multicellularity arose, suggesting that animals originated from a single cell type. This  
591 in turn generated the hypothesis that multicellular animals originated from a choanoflagellate-  
592 like colony-forming ancestor (Seb e-Pedr os et al., 2017), supported by the possible homology  
593 between sponge choanocytes and choanoflagellates (Adamska, 2016), and is consistent with the  
594 idea behind the Haeckel-Muller Biogenetic Law, that ontogenesis recapitulates phylogenesis  
595 (Hashimshony et al., 2015).



596           However, there are, for example, some basic differences between sponges and  
597 choanoflagellates in how their collar and flagella interact, so, though choanocytes and  
598 choanoflagellates are superficially similar, homology should not be automatically assumed (see  
599 Mah et al., 2014 for details). More importantly, recent ultrastructural studies on the structure of  
600 kinetids (flagellar apparatus) of various sponge choanocytes and choanoflagellates show that  
601 they are fundamentally different in many respects (see Pozdnyakov, Karpov, 2016; Pozdnyakov  
602 et al., 2017, 2018 for details). These differences are significant, as the kinetid (consisting of the  
603 flagella itself, the transition zone, and the kinetosomes with attached microtubular or fibrillar  
604 roots) represents one of the very few ultrastructural systems in eukaryotic cells considered a  
605 conservative indicator of phylogenetic relationship (Lynn, Small, 1981; Moestrup, 2000; Yubuki  
606 and Leander, 2013). Choanocyte kinetids contain more elements that can be considered  
607 plesiomorphic for opisthokonts than do choanoflagellate kinetids. For example, significant  
608 differences in the spatial arrangement of the non-flagellar basal body, in the structure of the  
609 transitional zone and the flagellar root system were found when comparing the flagellate  
610 apparatus of the freshwater sponge *Ephydatia fluviatilis* (order Haplosclerida) and the  
611 choanoflagellates, but in all of these features the *Ephydatia* choanocyte kinetid is similar to the  
612 kinetid of zoospores of chytrids, which are more distantly-related Holomycota (Karpov,  
613 Efremova, 1994). Flagellated cells of some ichthyosporeans also possess ultrastructural features in  
614 common with flagellated fungi from Holomycota. Therefore, the idea that sponges and by  
615 extension all Metazoa descend directly from a single-celled organism similar to  
616 choanoflagellates is not supported by the results of the kinetid ultrastructure study (Pozdnyakov  
617 et al., 2017).

618           A more detailed understanding of the unicellular relatives of animals has, however, raised  
619 an alternative to the Gastrea theory. Specifically, the presence of diverse life forms in complex  
620 life cycles and the prevalence of cellular aggregations that bear little similarity to the blastula all  
621 suggest that cell *differentiation might have preceded* the origin of the blastula. Moreover,  
622 unicellular relatives of animals were shown to contain a variety of genes homologous to those  
623 involved in cell adhesion, differentiation and development, and signal transduction in Metazoa.  
624 Some of them were considered to be unique to animals (e.g. transcription factors T-box and  
625 Rel/NF-kappa B, Crumbs protein, integrin beta) as they were absent in choanoflagellates (the  
626 closest relatives of Metazoa), but later they were found to be present in other unicellular Holozoa  
627 (Mikhailov et al., 2009; Sebé-Pedrós et al., 2013a; Shalchian-Tabrizi et al., 2008). To date, it is  
628 well known that homologues of most genes controlling the development of animals, their cell  
629 differentiation, cell-cell and cell-matrix adhesion are present in various lineages of unicellular  
630 organisms (King et al., 2003; Sebé-Pedrós et al., 2016; Suga et al., 2013; Williams et al., 2014),

631 which suggests that genetic programs of cellular differentiation and adhesion arose relatively  
632 early in the evolution of opisthokonts and before the emergence of multicellularity (King et al.,  
633 2003; Ruiz-Trillo et al., 2007; Shalchian-Tabrizi et al., 2008; Mikhailov et al., 2009; Brunet,  
634 King, 2018).

635 One specific idea positing that cell differentiation preceded the formation of colonies is  
636 the “synzoospore hypothesis” (Sachwatkin, 1956; Zakhvatkin, 1949; and see Mikhailov et al.  
637 2009 for details). In brief, three types of cell cycle alternate in the ontogenesis of multicellular  
638 animals: monotomy (alternate phases of cell growth and division of somatic cells), hypertrophic  
639 growth (in female sex cells) and palintomy (the egg undergoes a series of consecutive divisions).  
640 Zakhvatkin noted that some protists alternate between different types of life cycle, and suggested  
641 that the unicellular ancestor of Metazoa already had differentiated cells as a result of such a  
642 complex life cycle. The life cycle complexity, in turn, results from the fact that monotomic cells  
643 are usually sedentary, or at least less mobile, and can change their phenotype (from flagellated to  
644 amoeboid, etc.) depending on the environment; the process of palintomy is necessary for the  
645 formation of morphologically identical dispersal cells (spores or zoospores). These dispersal  
646 cells remain attached to each other, forming a primary flagellated larva — the synzoospore or  
647 blastula (cited from Mikhailov et al., 2009).

648 The synzoospore hypothesis is consistent with recent observations of complex life cycles  
649 in unicellular opisthokonts possessing cellular differentiation, the presence of sedentary trophic  
650 phases, and a tendency to aggregation; as seen in choanoflagellates (Cavalier-Smith, 2017; Dayel  
651 et al., 2011; Dayel, King, 2014; Leadbeater, 1983; Maldonado, 2004), filastereans (Sebé-Pedrós  
652 et al., 2013b), *Corallochytrium* (Raghukumar, 1987), ichthyosporeans (Arkush et al., 2003;  
653 Ruiz-Trillo et al., 2007; Suga, Ruiz-Trillo, 2013), chytridiomycetes (Money, 2016), and  
654 nucleariid amoebae (Smirnov, 2000). According to this theory, multicellularity in animals arose  
655 through the temporal integration of various types of cells, which were already present in  
656 different parts of the life cycle. The hypothetical ancestor of animals in this model would thus  
657 already have genetic programs for cell differentiation (including cadherins, integrins, tyrosine  
658 kinases).

659 Developing the synzoospore hypothesis further, Mikhailov et al. (2009) proposed an  
660 evolutionary mechanism of “*transition from temporal to spatial cell differentiation*” to explain  
661 the emergence of multicellular animals. In this model, the ancestor of Metazoa was a sedentary  
662 colonial protist filter-feeder with colonies formed by cells of different types, which arose  
663 because filtration efficiency is significantly enhanced through the cooperation of cells of  
664 different types. Dispersal cells produced by the sedentary stage, the zoospores, remained  
665 attached together in early metazoans (which increased survivability) as a synzoospore to form a

666 primary larva, the blastula. Development of a whole colony from such a multicellular larva  
667 occurred through the *differentiation of genetically identical* zoospore cells. This was critical for  
668 the maintenance of long-term cell adhesion and thus emergence of true multicellularity, as  
669 opposite to temporary colonies and aggregations composed of genetically heterogeneous cells.  
670 The authors suggest that the dispersal stages of the sedentary trophic body — primary blastula-  
671 like larvae – acquired adaptations to the predatory lifestyle, which triggered the development of  
672 primary intestine, muscular and nervous systems (Mikhailov et al., 2009).

673         The origin of multicellularity can in this view be seen as a *transition from temporal to*  
674 *spatiotemporal cell differentiation* (Sebé-Pedrós et al., 2017). In a unicellular ancestor of  
675 Metazoa that was a sexually reproducing bacteriotroph with many differentiated, temporally-  
676 separated cells, the transitions between different cell states would be regulated by expression of  
677 transcription factor families in response to environmental conditions such as availability of  
678 nutrients or preferred bacterial food. These temporally-regulated cell types then became spatially  
679 integrated, existing simultaneously but in different parts of a now multicellular conglomerate  
680 with different cell types carrying out different functions. Further diversification could then be  
681 accompanied by the evolution of additional mechanisms for complex gene regulation networks  
682 involving signaling pathways, expansion of transcription factors, and the evolution of new  
683 genomic regulatory mechanisms to control spatial differentiation of existing genetic modules  
684 specific to a particular cell type. At that point, the life cycle of the protozoan ancestor of animals  
685 probably included one or more clonal and/or aggregative multicellular stages (Sebé-Pedrós et al.,  
686 2017).

687         To distinguish between the models for the origin of animal multicellularity, genomics  
688 alone is not sufficient, and data on morphology, life cycle, and structural features of basal  
689 holozoans is also needed. From the current analysis, all three novel species of unicellular  
690 Holozoa have life histories that are consistent with major elements of the synzoospore model  
691 (see Fig. 3A in Mikhailov et al., 2009 and Fig. 5a,b in Sebé-Pedrós et al., 2017). Specifically,  
692 these organisms have complex life histories characterized by a variety of forms: flagellates,  
693 amoebae, amoeboflagellates, cysts. All three species have the tendency to form aggregations.  
694 *Syssomonas* possesses both clonal and aggregative multicellular stages, as predicted for the  
695 ancestor of animals. Moreover, the formation of aggregations can be associated with feeding on  
696 large eukaryotic prey, but also by cysts, which can adhere to each other and to starch grains in  
697 culture and divide multiply. Both these probably require cellular signaling. Eating a large  
698 eukaryotic prey, sometimes exceeding the size of a predator, also leads to hypertrophic cell  
699 growth (described as proliferative stage in Sebé-Pedrós et al., 2017) with a subsequent phase of  
700 palintomic division (in *Syssomonas*). All these characters are predicted by the synzoospore

701 model. Interestingly, many of these are apparently triggered by the behaviour of feeding on large  
702 eukaryotic prey, highlighting this as is an interesting and potentially powerful trigger in general  
703 for the formation and development of aggregates (e.g., joint feeding) and clonal multicellularity  
704 (e.g., hypertrophic growth followed by palintomy), perhaps playing a role in the origin of  
705 multicellularity in ancestors of Metazoa.

706

### 707 **Concluding remarks**

708 As we acquire more information about the biology of known unicellular relatives of  
709 animals, and even more importantly, describe diverse new species of unicellular Holozoa, more  
710 reliable models for the evolutionary histories of specific characteristics that contributed to the  
711 emergence of multicellularity in animals are possible. *Syssomonas* and *Pigoraptor* are  
712 characterized by complex life cycles, the formation of multicellular aggregations, and an unusual  
713 diet for single-celled opisthokonts (partial cell fusion and joint sucking of large eukaryotic prey),  
714 all of these features providing new insights into the origin of multicellularity in Metazoa.

715 Genomic and transcriptome analysis of unicellular relatives of animals have shown that  
716 genes encoding proteins for cellular signaling and adhesion, as well as genes for embryonic  
717 development of multicellular organisms, arose before the emergence of multicellular animals  
718 (King et al., 2003; Ruiz-Trillo et al., 2007; Shalchian-Tabrizi et al., 2008; Hehenberger et al.,  
719 2017). While these genes almost certainly have slightly different functions in protists than in  
720 animals, they nevertheless probably relate to the ability to recognize the cells of their own  
721 species, prey, or organic molecules and contribute to the formation of multicellular aggregations,  
722 thus increasing the organism's ability to adapt to environmental change. As we learn more about  
723 the natural history and behaviour of these organisms, the importance of these processes becomes  
724 even more clear. The ancestor of Metazoa probably formed cells of various types that could  
725 aggregate and had molecular mechanisms of cell differentiation and adhesion related to those  
726 processes. Therefore, cellular differentiation likely arose before the emergence of  
727 multicellularity.

728 The feeding modes of the ancestral metazoan may also have been more complex than  
729 previously thought, including not only bacterial prey, but also larger eukaryotic cells and organic  
730 structures. Indeed, the ability to feed on large eukaryotic prey could have been a powerful trigger  
731 in the formation and development both aggregative and clonal multicellular stages that played  
732 important roles in the emergence of multicellularity in animals. Lastly, we wish to point out that  
733 other new and deep lineages of opisthokonts undoubtedly exist that have not yet been described,  
734 and each of these will play an important role in the development of hypotheses on the origin of  
735 multicellular animals in future.

## 736 **Materials and Methods**

737 Novel unicellular opisthokont predators were found in freshwater biotopes in Vietnam  
738 and Chile. *Syssomonas multiformis* (clone Colp-12) was obtained from the sample of freshwater  
739 pool (11°23'08.0"N, 107°21'44.9"E; T = 39°C; pH = 7.18; DO (ppm) = 0.64; conductivity  
740 ( $\mu\text{S}/\text{cm}$ ) = 281; TDS (ppm) = 140), Tà Lài, Cát Tiên National Park, Dong Nai Province, S.R.  
741 Vietnam on April 29, 2013. *Pigoraptor vietnamica* (clone Opistho-1) was obtained from  
742 freshwater Lake Dak Minh, silty sand on the littoral (12°54'50"N, 107°48'26"E; T = 27 °C;  
743 pH=7.03; DO (ppm) = 7.43; conductivity ( $\mu\text{S}/\text{cm}$ ) = 109; TDS (ppm) = 54), Dak Lak Province,  
744 S.R. Vietnam on March 26 2015. *Pigoraptor chileana* (clone Opistho-2) was obtained from the  
745 bottom sediments of freshwater temporary water body (submerged meadow, 54°02'29.7"S,  
746 68°55'18.3"W; T = 16.5°C; pH = 6.62; conductivity ( $\mu\text{S}/\text{cm}$ ) = 141; TDS (ppm) = 72) near the  
747 Lake Lago Blanca, Tierra del Fuego, Chile on November 4, 2015.

748 The samples were examined on the third, sixth and ninth days of incubation in accordance  
749 with methods described previously (Tikhonenkov et al., 2008). Following isolation by glass  
750 micropipette, freshwater clones Colp-12, Opistho-1, and Opistho-2 were propagated on the  
751 bodonid *Parabodo caudatus* (strain BAS-1, IBIW RAS) grown in Pratt's medium or spring  
752 water (Aqua Minerale, PepsiCo, Moscow Region, Russia or PC Natural Spring Water,  
753 President's Choice, Toronto, Canada) by using the bacterium *Pseudomonas fluorescens* as food  
754 (Tikhonenkov et al., 2014). The clone Colp-12 was perished after five years of cultivation. The  
755 clones Opistho-1 and Opistho-2 are stored in the "Live culture collection of free-living amoebae,  
756 heterotrophic flagellates and heliozoans" at the Institute for Biology of Inland Waters, Russian  
757 Academy of Science.

758 Light microscopy observations were made by using the Zeiss Axio Scope A.1 equipped  
759 with a DIC contrast water immersion objective (63x). The images were taken with the AVT  
760 HORN MC-1009/S analog video camera and directly digitized by using the Behold TV 409 FM  
761 tuner. Cells with engulfed starch granules were inspected by epifluorescence microscopy after  
762 DAPI staining using the Zeiss Axioplan 2 Imaging microscope.

763 For transmission electron microscopy (TEM), cells were centrifuged, fixed at 1 °C for 15-  
764 60 min in a cocktail of 0.6% glutaraldehyde and 2% OsO<sub>4</sub> (final concentration) prepared using a  
765 0.1 M cacodylate buffer (pH 7.2). Fixed cells were dehydrated in alcohol and acetone series (30,  
766 50, 70, 96, and 100%, 20 minutes in each step). Afterward, the cells were embedded in a mixture  
767 of Araldite and Epon (Luft, 1961). Ultrathin sections were prepared with an LKB  
768 ultramicrotome (Sweden) and observed by using the JEM 1011 transmission electron  
769 microscope (JEOL, Japan).

770 For scanning electron microscopy (SEM), cells from exponential growth phase were fixed  
771 as for TEM but only for 10 min at 22 °C and gently drawn onto a polycarbonate filter (diameter  
772 24 mm, pores 0.8 µm). Following the filtration, the specimens were taken through a graded  
773 ethanol dehydration and acetone, and finally put into a chamber of a critical point device for  
774 drying. Then dry filters with fixed specimens were mounted on aluminum stubs, coated with  
775 gold-palladium, and observed with a JSM-6510LV scanning electron microscope (JEOL, Japan).

776 Analysis of enzymes involved in starch breakdown was based on transcriptomic data  
777 obtained as described earlier (Hehenberger et al., 2017). To identify candidates putatively  
778 involved in starch breakdown, we used the results of a previous hmmscan analysis of *S.*  
779 *multiformis* (Hehenberger et al., 2017) to search for Pfam domains present in known starch-  
780 degrading enzymes/enzyme families, such as  $\alpha$ -amylases (PF00128), glycoside hydrolase  
781 families containing  $\alpha$ -glucosidases (PF02056, PF01055, PF03200, PF10566),  $\alpha$ -glucan water  
782 dikinase 1 (*GWD1*, PF01326), phosphoglucan phosphatase (*DSP4*, PF00782 and PF16561),  
783 disproportionating enzymes (PF02446) and pullulanases (PF17967). Additionally, we submitted  
784 the *S. multiformis* sorted transcriptome to the KEGG Automatic Annotation Server (KAAS)  
785 (Kanehisa et al., 2014) for functional annotation and investigated the output for transcripts  
786 involved in starch metabolism. All candidates were investigated using phylogenetic  
787 reconstruction. Briefly, they were used as queries in a BLASTp search (e-value threshold 1e-5)  
788 against a comprehensive custom database containing representatives of all major eukaryotic  
789 groups and RefSeq data from all bacterial phyla at NCBI (<https://www.ncbi.nlm.nih.gov/>, last  
790 accessed December 2017) (Altschul et al., 1990). The database was subjected to CD-HIT with a  
791 similarity threshold of 85% to reduce redundant sequences and paralogs (Li and Godzik, 2006).  
792 Results from blast searches were parsed for hits with a minimum query coverage of 50% and e-  
793 values of less than 1e-5. The number of bacterial hits was restrained to 20 hits per phylum (for  
794 FCB group, most classes of Proteobacteria, PVC group, Spirochaetes, Actinobacteria,  
795 Cyanobacteria (unranked) and Firmicutes) or 10 per phylum (remaining bacterial phyla) as  
796 defined by NCBI taxonomy. Parsed hits were aligned with MAFFT v. 7.212, using the—auto  
797 option, poorly aligned regions were eliminated using trimAl v.1.2 with a gap threshold of 80%  
798 (Katoh and Standley, 2013; Capella-Gutiérrez et al., 2009). Maximum likelihood tree  
799 reconstructions were then performed with FastTree v. 2.1.7 using the default options (Price et al.,  
800 2010). Phylogenies with overlapping taxa were consolidated by combining the parsed hits of the  
801 corresponding queries, removing duplicates and repeating the alignment, trimming and tree  
802 reconstruction steps as described above.

803

804

805           **Acknowledgements**

806           We thank Kristina I. Prokina for sample collection in Chile, Dr. Hoan Q. Tran and Tran  
807 Duc Dien for assistance with sample collection and trip management in Vietnam, Jürgen F.H.  
808 Strassert for help with DAPI staining, and Vladimir V. Aleshin and Kirill V. Mikhailov for  
809 fruitful discussion on different aspects of origin of Metazoa. Field work in Vietnam is part of the  
810 project “Ecolan 3.2” of the Russian-Vietnam Tropical Centre.

811           **Funding:** This work was supported by the Russian Science Foundation (grant no. 18-14-  
812 00239).

813           **Competing interests:** None declared.

814           **References**

- 815 Abedin M, King N. 2008. The premetazoan ancestry of cadherins. *Science* **319**:946–948.  
816 doi:10.1126/science.1151084
- 817 Adamska M. 2016. Sponges as models to study emergence of complex animals. *Curr Opin*  
818 *Genet Dev* **39**:21–28. doi:10.1016/j.gde.2016.05.026
- 819 Aleshin VV, Konstantinova AV, Mikhailov KV, Nikitin MA, Petrov NB. 2007. Do we need  
820 many genes for phylogenetic inference? *Biochemistry Mosc* **72**:1313–1323.  
821 doi:10.1134/S000629790712005X
- 822 Altschul, S.F., Gish, W., Miller, W., Myers, E.W., and Lipman, D.J. 1990. Basic local alignment  
823 search tool. *J. Mol. Biol.* **215**, 403–410.
- 824 Arkush KD, Mendoza L, Adkison MA, Hedrick RP. 2003. Observations on the life stages of  
825 *Sphaerothecum destruens* n. g., n. sp., a mesomycetozoean fish pathogen formally referred  
826 to as the rosette agent. *J Eukaryot Microbiol* **50**:430–438. doi:10.1111/j.1550-  
827 7408.2003.tb00269.x
- 828 Brown MW, Spiegel FW, Silberman JD. 2009. Phylogeny of the “forgotten” cellular slime mold,  
829 *Fonticula alba*, reveals a key evolutionary branch within Opisthokonta. *Mol Biol Evol*  
830 **26**:2699–2709. doi:10.1093/molbev/msp185
- 831 Brown MW, Kolisko M, Silberman JD, Roger AJ. 2012. Aggregative multicellularity evolved  
832 independently in the eukaryotic supergroup Rhizaria. *Curr Biol* **22**:1123–1127.  
833 doi:10.1016/j.cub.2012.04.021
- 834 Brunet T, King N. 2017. The origin of animal multicellularity and cell differentiation. *Dev Cell*  
835 **43**:124–140. doi:10.1016/j.devcel.2017.09.016
- 836 Capella-Gutiérrez, S., Silla-Martínez, J.M., and Gabaldón, T. 2009. trimAl: a tool for automated  
837 alignment trimming in large-scale phylogenetic analyses. *Bioinformatics* **25**, 1972–1973.

- 838 Cavalier-Smith T. 2017. Origin of animal multicellularity: precursors, causes, consequences –  
839 the choanoflagellate/sponge transition, neurogenesis and the Cambrian explosion. *Philos*  
840 *Trans R Soc Lond B Biol Sci* **372**:20150476. doi:10.1098/rstb.2015.0476
- 841 Cavalier-Smith T, Chao EE. 2003. Phylogeny of Choanozoa, Apusozoa, and other Protozoa and  
842 early eukaryote megaevolution. *J Mol Evol* **56**:540–563. doi:10.1007/s00239-002-2424-z
- 843 Carr M, Richter DJ, Fozouni P, Smith YJ, Jeuck A, Leadbeater BSC, Nitsche F. 2017. A six-  
844 gene phylogeny provides new insights into choanoflagellate evolution. *Mol Phylogenet*  
845 *Evol* **107**:166–178. doi:10.1016/j.ympev.2016.10.011
- 846 Dayel MJ, King N, 2014. Prey capture and phagocytosis in the choanoflagellate *Salpingoeca*  
847 *rosetta*. *PLoS ONE* **9**:e95577. doi:10.1371/journal.pone.0095577
- 848 Dayel MJ, Agelado RA, Fairclough SR, Levin TC, Nichols SA, McDonald K, King N. 2011.  
849 Cell differentiation and morphogenesis in the colony-forming choanoflagellate  
850 *Salpingoeca rosetta*. *Dev Biol* **357**:73–82. doi:10.1016/j.ydbio.2011.06.003
- 851 del Campo J, Ruiz-Trillo I. 2013. Environmental survey meta-analysis reveals hidden diversity  
852 among unicellular opisthokonts. *Mol Biol Evol* **30**:802–805. doi:10.1093/molbev/mst006
- 853 Dunn CW, Hejnol A, Matus DQ, Pang K, Browne WE, Smith SA, Seaver E, Rouse GW, Obst  
854 M, Edgecombe GD, Sørensen MV, Haddock SH, Schmidt-Rhaesa A, Okusu A, Kristensen  
855 RM, Wheeler WC, Martindale MQ, Giribet G. 2008. Broad phylogenomic sampling  
856 improves resolution of the animal tree of life. *Nature* **452**:745–749.  
857 doi:10.1038/nature06614
- 858 Feuda R, Dohrmann M, Pett W, Philippe H, Rota-Stabelli O, Lartillot N, Wörheide G, Pisani D.  
859 2017. Improved modeling of compositional heterogeneity supports sponges as sister to all  
860 other animals. *Curr Biol* **27**:3864–3870.e4. doi:10.1016/j.cub.2017.11.008
- 861 Gobert GN, Stenzel DJ, McManus DP, Jones MK. 2003. The ultrastructural architecture of the  
862 adult *Schistosoma japonicum* tegument. *Int J Parasitol* **33**:1561–1575. doi:10.1016/S0020-  
863 7519(03)00255-8
- 864 Haeckel E. 1874. Die Gastraea-Theorie, die phylogenetische Klassifikation des Thierreichs und  
865 die Homologie der Keimblätter. *Jenaische Z Naturwiss* **8**:1–55. (in German).
- 866 Hashimshony T, Feder M, Levin M, Hall BK, Yanai I. 2015. Spatiotemporal transcriptomics  
867 reveals the evolutionary history of the endoderm germ layer. *Nature* **519**:219–222.  
868 doi:10.1038/nature13996
- 869 Hehenberger E, Tikhonenkov DV, Kolisko M, del Campo J, Esaulov AS, Mylnikov AP, Keeling  
870 PJ. 2017. Novel freshwater predators reshape holozoan phylogeny and reveal the presence  
871 of a two-component signalling system in the ancestor of animals. *Curr Biol* **27**:2043–2050.  
872 doi:10.1016/j.cub.2017.06.006



- 873 Hertel LA, Bayne CJ, Loker ES. 2002. The symbiont *Capsaspora owczarzaki*, nov. gen. nov. sp.,  
874 isolated from three strains of the pulmonate snail *Biomphalaria glabrata* is related to  
875 members of the Mesomycetozoea. *Int J Parasitol* **32**:1183–1191. doi:10.1016/s0020-  
876 7519(02)00066-8.
- 877 Ivanov AV. 1968. Origin of multicellular animals. Phylogenetic essays. Leningrad: Nauka. 287  
878 p. (in Russian).
- 879 James-Clark H. 1866. Note on the *Infusoria flagellata* and the *Spongiae ciliatae*. *Am. J. Sci*  
880 **1**:113–114.
- 881 Kanehisa M, Goto S, Sato Y, Kawashima M, Furumichi M, Tanabe M. 2014. Data, information,  
882 knowledge and principle: back to metabolism in KEGG. *Nucleic Acids Res.* **42**:D199–  
883 D205.
- 884 Karpov SA, Efremova SM. 1994. Ultrathin structure of the flagellar apparatus in the choanocyte  
885 of the sponge *Ephydatia fluviatilis*. *Tsitologia* **36**:403–408 (in Russian)
- 886 Katoh, K., and Standley, D.M. 2013. MAFFT multiple sequence alignment software version 7:  
887 improvements in performance and usability. *Mol. Biol. Evol.* **30**, 772–780.
- 888 King N, Hittinger CT, Carroll SB. 2003. Evolution of key cell signaling and adhesion protein  
889 families predates animal origins. *Science* **301**:361–363. doi:10.1126/science.1083853
- 890 King N, Westbrook MJ, Young SL, Kuo A, Abedin M, Chapman J, Fairclough S, Hellsten U,  
891 Isogai Y, Letunic I, Marr M, Pincus D, Putnam N, Rokas A, Wright KJ, Zuzow R, Dirks  
892 W, Good M, Goodstein D, Lemons D, Li W, Lyons JB, Morris A, Nichols S, Richter DJ,  
893 Salamov A, Sequencing JG, Bork P, Lim WA, Manning G, Miller WT, McGinnis W,  
894 Shapiro H, Tjian R, Grigoriev IV, Rokhsar D. 2008. The genome of the choanoflagellate  
895 *Monosiga brevicollis* and the origin of metazoans. *Nature* **451**:783–788.  
896 doi:10.1038/nature06617
- 897 Lang BF, O'Kelly C, Nerad T, Gray MW, Burger G. 2002. The closest unicellular relatives of  
898 animals. *Curr Biol* **12**:1773–1778. doi:10.1016/S0960-9822(02)01187-9
- 899 Leadbeater BSC. 1983. Life-history and ultrastructure of a new marine species of  
900 *Proterospongia* (Choanoflagellida). *J Mar Biol Assoc UK* **63**:135–160.  
901 doi:10.1017/S0025315400049857
- 902 Leys SP, Cheung E, Boury-Esnaulty N. 2006. Embryogenesis in the glass sponge *Oopsacas*  
903 *minuta*: formation of syncytia by fusion of blastomeres. *Integr Comp Biol* **46**:104–117.  
904 doi:10.1093/icb/icj016
- 905 Li, W., and Godzik, A. 2006. Cd-hit: a fast program for clustering and comparing large sets of  
906 protein or nucleotide sequences. *Bioinformatics* **22**, 1658–1659.

- 907 Lynn DH, Small EB. 1981. Protist kinetids: structural conservatism, kinetid structure, and  
908 ancestral states. *Biosystems* **14**:377–385. doi:10.1016/0303-2647(81)90044-7
- 909 Mah JL, Christensen-Dalsgaard KK, Leys S.P. 2014. Choanoflagellate and choanocyte collar-  
910 flagellar systems and the assumption of homology. *Evolution and Development* **16**:25–37.  
911 doi:10.1111/ede.12060.
- 912 Maldonado M. 2004. Choanoflagellates, choanocytes, and animal multicellularity. *Invertebr Biol*  
913 **123**:1–22. doi:10.1111/j.1744-7410.2004.tb00138.x
- 914 Maloof AC, Rose CV, Beach R, Samuels BM, Calmet CC, Erwin DH, Poirier GR, Yao N,  
915 Simons FJ. 2010. Possible animal-body fossils in pre-Marinoan limestones from South  
916 Australia. *Nat Geosci* **3**:653–659. doi:10.1038/ngeo934
- 917 Medina M, Collins AG, Taylor JW, Valentine JW, Lipps JH, Amaral-Zettler L, Sogin ML. 2003.  
918 Phylogeny of Opisthokonta and the evolution of multicellularity and complexity in Fungi  
919 and Metazoa. *J Astrobiol* **2**:203–211. doi:10.1017/S1473550403001551
- 920 Mikhailov KV, Konstantinova AV, Nikitin MA, Troshin PV, Rusin LY, Lyubetsky VA, Panchin  
921 YV, Mylnikov AP, Moroz LL, Kumar S, Aleoshin VV. 2009. The origin of Metazoa: a  
922 transition from temporal to spatial cell differentiation. *Bio Essays* **31**:758–768.  
923 doi:10.1002/bies.200800214
- 924 Moestrup Ø. 2000. The flagellate cytoskeleton: Introduction of a general terminology for  
925 microtubular roots in protists. In: Leadbeater BS, Green JC, editors. *The Flagellates: Unity,*  
926 *Diversity and Evolution*. London: Taylor & Francis. pp 69–94.
- 927 Money NP. 2016. Fungal Diversity. In: *The Fungi (Third Edition)*. Eds: Watkinson SC, Boddy  
928 L, Money NP. Elsevier. pp. 1–36.
- 929 Moroz LL, Kocot KM, Citarella MR, Dosung S, Norekian TP, Povolotskaya IS, Grigorenko AP,  
930 Dailey C., Berezikov E, Buckley KM, Ptitsyn A, Reshetov D, Mukherjee K, Moroz TP,  
931 Bobkova E, Yu F, Kapitonov VV, Jurka J, Bobkov YV, Swore JJ, Girardo DO, Fodor A,  
932 Gusev F, Sanford R, Bruders R, Kittler E, Mills CE, Rast JP, Derelle R, Solovyev VV,  
933 Kondrashov FA, Swalla BJ, Sweedler JV, Rogaev EI, Halanych KM, Kohn AB. 2014. The  
934 ctenophore genome and the evolutionary origins of neural systems. *Nature* **510**: 109–  
935 114. doi: 10.1038/nature13400.
- 936 Mylnikov AP, Tikhonenkov DV, Karpov SA, Wylezich C. 2019. Microscopical studies on  
937 picoplanctonic *Ministeria vibrans* Tong, 1997 (Filasterea) highlights the cytoskeletal  
938 structure of the common ancestor of Filasterea, Metazoa and Choanoflagellata. *Protist*.  
939 doi.org/10.1016/j.protis.2019.07.001
- 940 Nielsen C. 1987. Structure and function of metazoan ciliary bands and their phylogenetic  
941 significance. *Acta Zoolog* **68**:205–262. doi:10.1111/j.1463-6395.1987.tb00892.x

- 942 Nielsen C. 2008. Six major steps in animal evolution: are we derived sponge larvae? *Evol Dev*  
943 **10**:241–257. doi:10.1111/j.1525-142X.2008.00231.x
- 944 Owczarzak A, Stibbs HH, Bayne CJ. 1980. The destruction of *Schistosoma mansoni* mother  
945 sporocysts in vitro by amoebae isolated from *Biomphalaria glabrata*: an ultrastructural  
946 study. *J Invertebr Pathol* **35**:26–33. doi:10.1016/0022-2011(80)90079-8
- 947 Philippe H, Derelle R, Lopez P, Pick K, Borchiellini C, Boury-Esnault N, Vacelet J, Renard E,  
948 Houliston E, Quéinnec E, Da Silva C, Wincker P, Le Guyader H, Leys S, Jackson DJ,  
949 Schreiber F, Erpenbeck D, Morgenstern B, Wörheide G, Manuel M. 2009. Phylogenomics  
950 revives traditional views on deep animal relationships. *Curr Biol* **19**:706–712.  
951 doi:10.1016/j.cub.2009.02.052
- 952 Pozdnyakov IR, Karpov SA. 2016. Kinetid Structure in Choanocytes of Sponges  
953 (Heteroscleromorpha): Toward the Ancestral Kinetid of Demospongiae. *J Morph* **277**:925–  
954 934. doi:10.1002/jmor.20546
- 955 Pozdnyakov IR, Sokolova AM, Ereskovsky AV, Karpov SA. 2017. Kinetid structure of  
956 choanoflagellates and choanocytes of sponges does not support their close relationship.  
957 *Protistology* **11**:248–264. doi:10.21685/1680-0826-2017-11-4-6
- 958 Pozdnyakov IR, Sokolova AM, Ereskovsky AV, Karpov SA. 2018. Kinetid structure in sponge  
959 choanocytes of Spongillida and Scopalinida in the light of evolutionary relationships  
960 within Demospongiae. *Zool J Linnean Soc* **184**:255–272 doi:10.1093/zoolinnean/zlx109
- 961 Price, M.N., Dehal, P.S., and Arkin, A.P. 2010. FastTree 2—approximately maximum-likelihood  
962 trees for large alignments. *PLoS ONE* **5**, e9490.
- 963 Raghukumar S. 1987. Occurrence of the Thraustochytrid, *Corallochytrium limacisporum* gen. et  
964 sp. nov. in the coral reef lagoons of the Lakshadweep Islands in the Arabian Sea. *Bot Mar*  
965 **30**:83–89. doi:10.1515/botm.1987.30.1.83
- 966 Ratcliff WC, Denison RF, Borrello M, Travisano M. 2012. Experimental evolution of  
967 multicellularity. *Proc Nat Acad Sci USA* **109**:1595–1600. doi:10.1073/pnas.1115323109
- 968 Ruiz-Trillo I, Burger G, Holland PW, King N, Lang BF, Roger AJ, Gray MW. 2007. The origins  
969 of multicellularity: a multi-taxon genome initiative. *Trends Genet* **23**:113–118.  
970 doi:10.1016/j.tig.2007.01.005
- 971 Ruiz-Trillo I, Roger AJ, Burger G, Gray MW, Lang BF. 2008. A phylogenomic investigation  
972 into the origin of metazoa. *Mol Biol Evol* **25**:664–672. doi:10.1093/molbev/msn006
- 973 Ryan JF, Pang K, Schnitzler CE, Nguyen AD, Moreland RT, Simmons DK, Koch BJ, Francis  
974 WR, Havlak P, NISC Comparative Sequencing Program, Smith SA, Putnam NH, Haddock  
975 SH, Dunn CW, Wolfsberg TG, Mullikin JC, Martindale MQ, Baxevanis AD. 2013. The

- 976 genome of the ctenophore *Mnemiopsis leidyi* and its implications for cell type evolution.  
977 *Science* **342**:1242592. doi:10.1126/science.1242592
- 978 Sachwatkin AA. 1956. Vergleichende embryologie der niederen wirbellosen: ursprung und  
979 gestaltungswege der individuellen entwicklung der vielzeller. Berlin: VEB Deutscher  
980 Verlag der Wissenschaften. S. 401.
- 981 Schierwater B, Eitel M, Jakob W, Osigus H-J, Hadrys H, Dellaporta SL, Kolokotronis S-O, De  
982 Salle R. 2009. Concatenated analysis sheds light on early metazoan evolution and fuels a  
983 modern “Urmetazoon” hypothesis. *PLoS Biol* **7**:e1000020.  
984 doi:10.1371/journal.pbio.1000020
- 985 Sebé-Pedrós A, Ariza-Cosano A, Weirauch MT, Leininger S, Yang A, Torruella G, Adamski M,  
986 Adamska M, Hughes TR, Gómez-Skarmeta JL, Ruiz-Trillo I. 2013a. Early evolution of the  
987 T-box transcription factor family. *Proc Natl Acad Sci USA* **110**:16050–16055.  
988 doi:10.1073/pnas.1309748110
- 989 Sebé-Pedrós A, Irimia M, Del Campo J, Parra-Acero H, Russ C, Nusbaum C, Blencowe BJ,  
990 Ruiz-Trillo I. 2013b. Regulated aggregative multicellularity in a close unicellular relative  
991 of metazoan. *eLife* **2**:e01287. doi:10.7554/eLife.01287
- 992 Sebé-Pedrós A, Peña MI, Capella-Gutiérrez S, Antó M, Gabaldón T, Ruiz-Trillo I, Sabido E.  
993 2016. High-throughput proteomics reveals the unicellular roots of animal  
994 phosphosignaling and cell differentiation. *Dev Cell* **39**:186–197.  
995 doi:10.1016/j.devcel.2016.09.019
- 996 Sebé-Pedrós A, Degnan BM, Ruiz-Trillo I. 2017. The origin of Metazoa: a unicellular  
997 perspective. *Nat Rev Genet* **18**:498–512. doi:10.1038/nrg.2017.21
- 998 Shalchian-Tabrizi K, Minge MA, Espelund M, Orr R, Ruden T, Jakobsen KS, Cavalier-Smith T.  
999 2008. Multigene phylogeny of choanozoa and the origin of animals. *PLoS ONE* **3**:e2098.  
1000 doi:10.1371/journal.pone.0002098
- 1001 Sharpe SC, Eme L, Brown MW, Roger AJ. 2015. Timing the origins of multicellular eukaryotes  
1002 through phylogenomics and relaxed molecular clock analyses. Evolutionary transitions to  
1003 multicellular life. Advances in Marine Genomics. Ruiz-Trillo I, Nedelcu AM (Eds.).  
1004 Netherlands: Springer. P. 3–29.
- 1005 Signorovitch AY, Buss LW, Dellaporta SL. 2007. Comparative genomics of large mitochondria  
1006 in Placozoans. *PLoS Genet* **3**:e13. doi:10.1371/journal.pgen.0030013
- 1007 Simion P, Philippe H, Baurain D, Jager M, Richter DJ, Di Franco A, Roure B, Satoh N,  
1008 Quéinnec É, Ereskovsky A, Lapébie P, Corre E, Delsuc F, King N, Wörheide G, Manuel  
1009 M. 2017. A large and consistent phylogenomic dataset supports sponges as the sister group  
1010 to all other animals. *Curr Biol* **27**:958–967. doi:10.1016/j.cub.2017.02.031

- 1011 Smirnov AV. 2000. Subclass Aconchulina. In: Alimov AF, editor. Protista. Pt. 1. Handbook on  
1012 zoology. St-Petersburg. Nauka. pp. 485–490.
- 1013 Srivastava M, Begovic E, Chapman J, Putnam NH, Hellsten U, Kawashima T, Kuo A, Mitros T,  
1014 Salamov A, Carpenter ML, Signorovitch AY, Moreno MA, Kamm K, Grimwood J,  
1015 Schmutz J, Shapiro H, Grigoriev IV, Buss LW, Schierwater B, Dellaporta SL, Rokhsar  
1016 DS. 2008. The *Trichoplax* genome and the nature of placozoans. *Nature* **454**: 955–960. doi:  
1017 10.1038/nature07191
- 1018 Srivastava M, Simakov O, Chapman J, Fahey B, Gauthier ME, Mitros T, Richards GS, Conaco  
1019 C, Dacre M, Hellsten U, Larroux C, Putnam NH, Stanke M, Adamska M, Darling A,  
1020 Degnan SM, Oakley TH, Plachetzki DC, Zhai Y, Adamski M, Calcino A, Cummins SF,  
1021 Goodstein DM, Harris C, Jackson DJ, Leys SP, Shu S, Woodcroft BJ, Vervoort M, Kosik  
1022 KS, Manning G, Degnan BM, Rokhsar DS. 2010. The *Amphimedon queenslandica* genome  
1023 and the evolution of animal complexity. *Nature* **466**: 720–726. doi: 10.1038/nature09201
- 1024 Suga H, Ruiz-Trillo I. 2013. Development of ichthyosporeans sheds light on the origin of  
1025 metazoan multicellularity. *Dev Biol* **377**:284–292. doi:10.1016/j.ydbio.2013.01.009
- 1026 Suga H, Chen Z, de Mendoza A, Sebé-Pedrós A, Brown MW, Kramer E, Carr M, Kerner P,  
1027 Vervoort M, Sánchez-Pons N, Torruella G, Derelle R, Manning G, Lang BF, Russ C, Haas  
1028 BJ, Roger AJ, Nusbaum C, Ruiz-Trillo I. 2013. The *Capsaspora* genome reveals a  
1029 complex unicellular prehistory of animals. *Nat Commun* **4**:2325. doi:10.1038/ncomms3325
- 1030 Tikhonenkov DV, Mazei YA, Embulaeva EA. 2008. Degradational Succession of a  
1031 Community of Heterotrophic Flagellates in Microcosm Experiments. *Zh Obshch*  
1032 *Biol* **69**:57–64
- 1033 Tikhonenkov DV, Janouškovec J, Mylnikov AP, Mikhailov KV, Simdyanov TG, Aleoshin VV,  
1034 Keeling PJ. 2014. Description of *Colponema vietnamica* sp.n. and *Acavomonas peruviana*  
1035 n. gen. n. sp., two new alveolate phyla (Colponemidia nom. nov. and Acavomonidia nom.  
1036 nov.) and their contributions to reconstructing the ancestral state of alveolates and  
1037 eukaryotes. *PLoS ONE* **9**:e95467. doi:10.1371/journal.pone.0095467
- 1038 Torruella G, Derelle R, Paps J, Lang BF, Roger AJ, Shalchian-Tabrizi K, Ruiz-Trillo I. 2012.  
1039 Phylogenetic relationships within the Opisthokonta based on phylogenomic analyses of  
1040 conserved single-copy protein domains. *Mol Biol Evol* **29**:531–544.  
1041 doi:10.1093/molbev/msr185
- 1042 Torruella G, de Mendoza A, Grau-Bové X, Antó M, Chaplin MA, del Campo J, Eme L, Pérez-  
1043 Córdón G, Whipps CM, Nichols KM, Paley R, Roger AJ, Sitjà-Bobadilla A, Donachie S,  
1044 Ruiz-Trillo I. 2015. Phylogenomics reveals convergent evolution of lifestyles in close  
1045 relatives of animals and fungi. *Curr Biol* **25**:2404–2410. doi:10.1016/j.cub.2015.07.053

- 1046 Whelan NV, Kocot KM, Moroz LL, Halanych KM. 2015. Error, signal, and the placement of  
1047 *Ctenophora* sister to all other animals. *Proc Natl Acad Sci USA* **112**:5773–5778.  
1048 doi:10.1073/pnas.1503453112
- 1049 Wickstead B, Gull K. 2012. Evolutionary biology of dyneins. In: King S, editor. *Dyneins*.  
1050 Elsevier. pp. 89–121.
- 1051 Williams F, Tew HA, Paul CE, Adams JC. 2014. The predicted secretomes of *Monosiga*  
1052 *brevicollis* and *Capsaspora owczarzaki*, close unicellular relatives of metazoans, reveal  
1053 new insights into the evolution of the metazoan extracellular matrix. *Matrix Biol* **37**:60–68.  
1054 doi:10.1016/j.matbio.2014.02.002
- 1055 Yubuki N, Leander BS. 2013. Evolution of microtubule organizing centers across the tree of  
1056 eukaryotes. *Plant J* **75**:230–244. doi:10.1111/tpj.12145
- 1057 Zakhvatkin AA. 1949. The comparative embryology of the low invertebrates. Sources and  
1058 method of the origin of metazoan development. Moscow, Soviet Science. p. 395. (in  
1059 Russian).
- 1060 **Legends for videos**
- 1061 Video 1. Swimming of *Syssomonas multiformis* cell with rotation.
- 1062 Video 2. Attached cell of *Syssomonas multiformis* and rapid flagellum beating.
- 1063 Video 3. Amoebflagellate stage of *Syssomonas multiformis*. Cells of eukaryotic prey  
1064 *Parabodo caudatus* are also visible.
- 1065 Video 4. Loss of flagellum in *Syssomonas multiformis* and transition to amoeba.
- 1066 Video 5. Transformation of amoeba into a cyst in *Syssomonas multiformis*.
- 1067 Video 6. Palintomic divisions inside the cyst of *Syssomonas multiformis*.
- 1068 Video 7. Division into two cell structures in *Syssomonas multiformis*.
- 1069 Video 8. Cell and cyst of *Syssomonas multiformis* with vesicular structures inside.
- 1070 Video 9. Feeding of *Syssomonas multiformis* on eukaryotic prey.
- 1071 Video 10. Feeding of *Syssomonas multiformis* on bacteria.
- 1072 Video 11. Temporary cell aggregations of *Syssomonas multiformis*.
- 1073 Video 12. Floating rosette-like aggregation of *Syssomonas multiformis*.
- 1074 Video 13. Syncytium-like structures and budding of young flagellated daughter cells in  
1075 *Syssomonas multiformis*.
- 1076 Video 14. Joint feeding of *Pigoraptor vietnamica* on died cell of *Parabodo caudatus*.
- 1077 Video 15. Joint feeding of *Pigoraptor chileana* on died cell of *Parabodo caudatus*.
- 1078 Video 16. Temporary cell aggregation of *Pigoraptor chileana*.
- 1079 **Videos are available at**
- 1080 **<https://drive.google.com/drive/folders/1ewNvwSQCAVG81eYjJPdhR41aBpUKR05L>**
